# Supplementary material for: Association of GC Variants with Bone Mineral Density and Serum VDBP Concentrations in Mexican Population
Source: MDPI journal article supplement (doi:10.3390/genes12081176), 2021-07-29
Supplement: s1 [file s1]

**Table S1.** Descriptive statistics of VitD metabolites by sex.

| Characteristics                                                    | All participants<br>n=1,853 | Women<br>n=1289    | Men<br>n=565       | <i>P</i> value |
|--------------------------------------------------------------------|-----------------------------|--------------------|--------------------|----------------|
| Total 25-hydroxivitamin D (ng/mL) <sup>a</sup>                     | 21.1(20.8-21.5)             | 20.8(20.4-21.2)    | 21.9(21.3-22.5)    | 0.040          |
| Vitamin D-binding protein (μmol/l) <sup>a</sup>                    | 271.5(268.0-275.0)          | 275.1(270.9-279.3) | 263.2(256.9-269.5) | 0.001          |
| Free 25-hydroxivitamin D (pg/mL) <sup>a</sup>                      | 5.9(5.7-6.0)                | 5.7(5.6-5.8)       | 6.2(6.0-6.5)       | 0.001          |
| Bioavailable 25-hydroxivitamin D (ng/mL) <sup>a</sup>              | 2.2(2.2-2.3)                | 2.1(2.0-2.2)       | 2.4(2.3-2.5)       | <0.001         |
| Free 25-hydroxivitamin D-SNP adjusted (pg/mL) <sup>a</sup>         | 6.7(6.5-6.9)                | 6.5(6.3-6.7)       | 7.2(6.9-7.5)       | <0.001         |
| Bioavailable 25-hydroxivitamin D-SNP adjusted (ng/mL) <sup>a</sup> | 2.5(2.5-2.6)                | 2.4(2.3-2.5)       | 2.7(2.6-2.8)       | <0.001         |

<sup>a</sup> Adjusted median (95% CI). Median adjusted by age groups, BMI (normal, overweight, obesity), leisure time physical activity (active >150 min/week), vitamin D intake (quartiles) and smoking (never, smoking, former smoker).

**Table S2.** Factors associated with VDBP levels in all participants.

| Variable                                       | Univariable model                       |                                         |                                         |                                        |                                        | Multivariable model                   |                                        |                                         |                                        |                                      |
|------------------------------------------------|-----------------------------------------|-----------------------------------------|-----------------------------------------|----------------------------------------|----------------------------------------|---------------------------------------|----------------------------------------|-----------------------------------------|----------------------------------------|--------------------------------------|
|                                                | Coefficient (95% CI)                    |                                         |                                         |                                        |                                        | Coefficient (95% CI)                  |                                        |                                         |                                        |                                      |
|                                                | 10 <sup>h</sup>                         | 25 <sup>th</sup>                        | 50 <sup>th</sup>                        | 75 <sup>th</sup>                       | 90 <sup>th</sup>                       | 10 <sup>h</sup>                       | 25 <sup>th</sup>                       | 50 <sup>th</sup>                        | 75 <sup>th</sup>                       | 90 <sup>th</sup>                     |
| Age(years)                                     | <b>-0.6*</b><br>(-0.9,-0.4)             | <b>-0.5*</b><br>(-0.7,-0.3)             | <b>-0.3*</b><br>(-0.6,-0.1)             | -0.1<br>(-0.4,0.2)                     | <b>-0.5*</b><br>(-0.9,-0.02)           | <b>-0.6*</b><br>(-0.9,-0.2)           | <b>-0.7*</b><br>(-1.0,-0.4)            | <b>-0.5*</b><br>(-0.8,-0.2)             | -0.2<br>(-0.6,0.2)                     | -0.2<br>(-0.8,0.3)                   |
| Leisure time physical activity                 |                                         |                                         |                                         |                                        |                                        |                                       |                                        |                                         |                                        |                                      |
| Inactive (<30 min/day)                         | Ref.                                    | Ref.                                    | Ref.                                    | Ref.                                   | Ref.                                   | Ref.                                  | Ref.                                   | Ref.                                    | Ref.                                   | Ref.                                 |
| Active (≥30 min/day)                           | -1.5<br>(-10.7,7.6)                     | 6.9<br>(-0.6,14.5)                      | <b>11.6*</b><br>( <b>3.9,19.3</b> )     | <b>15.0*</b><br>( <b>5.9,24.1</b> )    | <b>18.8*</b><br>( <b>4.2,33.3</b> )    | 9.1<br>(-1.46,19.7)                   | 8.7<br>(-1.0,18.4)                     | <b>13.1*</b><br>( <b>3.4,22.8</b> )     | <b>15.0*</b><br>( <b>2.2,27.8</b> )    | <b>19.5*</b><br>( <b>2.7,36.3</b> )  |
| Smoking status                                 | <b>-22.4*</b><br>( <b>-32.4,-12.4</b> ) | <b>-12.2*</b><br>( <b>-22.3,-2.2</b> )  | -7.5<br>(-16.9,1.8)                     | -7.5<br>(-17.6,2.7)                    | <b>-23.1*</b><br>( <b>-37.0,-9.3</b> ) | -7.3<br>(-19.2,4.5)                   | 3.5<br>(-7.4,14.4)                     | 1.6<br>(-9.3,12.4)                      | -0.6<br>(-14.9,13.8)                   | -5.9<br>(-24.8,12.9)                 |
| Normal                                         |                                         |                                         |                                         |                                        |                                        |                                       |                                        |                                         |                                        |                                      |
| Current                                        | Ref.                                    | Ref.                                    | Ref.                                    | Ref.                                   | Ref.                                   | Ref.                                  | Ref.                                   | Ref.                                    | Ref.                                   | Ref.                                 |
| Past                                           | 1.6<br>(-7.4,10.5)                      | -2.5<br>(-9.9,4.9)                      | -6.11<br>(-13.6,1.33)                   | -1.11<br>(-9.9,7.7)                    | -8.9<br>(-24.6,6.8)                    | 0.11<br>(-8.1,8.3)                    | -4.6<br>(-12.1,3.0)                    | -7.1<br>(-14.6,0.4)                     | -4.2<br>(-14.2,5.7)                    | -8.3<br>(-21.3,4.8)                  |
| BMI (kg/m <sup>2</sup> )                       |                                         |                                         |                                         |                                        |                                        |                                       |                                        |                                         |                                        |                                      |
| Normal                                         | Ref.                                    | Ref.                                    | Ref.                                    | Ref.                                   | Ref.                                   | Ref.                                  | Ref.                                   | Ref.                                    | Ref.                                   | Ref.                                 |
| Overweight                                     | -2.1<br>(-15.1,11.0)                    | -2.3<br>(-13.5,8.8)                     | -10.1<br>(-21.1,0.8)                    | -2.5<br>(-16.2,11.1)                   | -14.4<br>(-35.5,6.6)                   | -1.1<br>(-13.3,11.2)                  | -8.0<br>(-19.3,3.2)                    | -6.4<br>(-17.6,4.8)                     | 1.2<br>(-13.6,16.1)                    | -4.8<br>(-24.3,14.6)                 |
| Obesity                                        | -2.5<br>(-12.1,7.0)                     | 0.5<br>(-7.6,8.6)                       | -0.07<br>(-8.1,8.0)                     | 2.9<br>(-7.1,12.9)                     | 3.2<br>(-12.2,18.5)                    | -2.4<br>(-11.2,6.5)                   | 1.6<br>(-6.6,9.7)                      | 3.1<br>(-5.0,11.3)                      | 5.1<br>(-5.6,15.9)                     | 7.4<br>(-6.7,21.6)                   |
| Total 25-hydroxivitamin D (ng/mL) <sup>a</sup> |                                         |                                         |                                         |                                        |                                        |                                       |                                        |                                         |                                        |                                      |
| Vitamin D intake (UI/day) <sup>a</sup>         | Ref.                                    | Ref.                                    | Ref.                                    | Ref.                                   | Ref.                                   | Ref.                                  | Ref.                                   | Ref.                                    | Ref.                                   | Ref.                                 |
| Alcohol(g/day) <sup>a</sup>                    | -4.3<br>(-13.7,5.0)                     | -8.1<br>(-15.5,-0.6)                    | -7.3<br>(-15.5,0.9)                     | -3.3<br>(-12.9,6.2)                    | -12.5<br>(-27.5,2.4)                   | -1.81<br>(-10.6,7.0)                  | -4.5<br>(-12.6,3.6)                    | 0.6<br>(-7.4,8.7)                       | -1.6<br>(-12.3,9.1)                    | -7.2<br>(-21.2,6.7)                  |
| rs4588                                         | -6.5<br>(-17.3,4.3)                     | -5.9<br>(-14.5,2.8)                     | -3.7<br>(-13.1,5.7)                     | -5.9<br>(-17.0,5.2)                    | -5.6<br>(-22.9,11.8)                   | -9.2<br>(-19.4,1.1)                   | -7.0<br>(-16.5,2.4)                    | 0.8<br>(-8.6,10.2)                      | -3.0<br>(-15.5,9.4)                    | -9.2<br>(-25.5,7.2)                  |
| CC                                             | 0.5<br>(-0.1,1.1)                       | 0.4<br>(-0.1,0.9)                       | 0.1<br>(-0.4,0.6)                       | -0.3<br>(-0.9,0.3)                     | <b>-1.3*</b><br>( <b>-2.3,-0.3</b> )   | 0.4<br>(-0.2,1.0)                     | 0.3<br>(-16.5,2.4)                     | 0.04<br>(-0.5,0.6)                      | -0.7<br>(-1.4,0.004)                   | <b>-1.1*</b><br>( <b>-2.1,-0.2</b> ) |
| CA+AA                                          | -0.0001<br>(-0.02,0.02)                 | -0.001<br>(-0.02,0.02)                  | -0.002<br>(-0.02,0.02)                  | -0.008<br>(-0.03,0.02)                 | -0.002<br>(-0.04,0.04)                 | -0.003<br>(-0.02,0.02)                | -0.007<br>(-0.03,0.01)                 | 0.002<br>(-0.02,0.02)                   | 0.005<br>(-0.02,0.03)                  | -0.002<br>(-0.04,0.03)               |
| rs7041                                         | 0.05<br>(-0.20,0.30)                    | 0.02<br>(-0.19,0.22)                    | -0.05<br>(-0.26,0.16)                   | -0.10<br>(-0.35,0.16)                  | -0.004<br>(-0.43,0.42)                 | 0.05<br>(-0.2,0.3)                    | -0.008<br>(-0.22,0.20)                 | -0.03<br>(-0.24,0.18)                   | 0.23<br>(-0.04,0.51)                   | 0.22<br>(-0.14,0.58)                 |
| TT                                             |                                         |                                         |                                         |                                        |                                        |                                       |                                        |                                         |                                        |                                      |
| TG                                             | Ref.                                    | Ref.                                    | Ref.                                    | Ref.                                   | Ref.                                   | Ref.                                  | Ref.                                   | Ref.                                    | Ref.                                   | Ref.                                 |
| GG                                             | <b>-8.6*</b><br>( <b>-16.2,-1.0</b> )   | <b>-16.7*</b><br>( <b>-22.8,-10.6</b> ) | <b>-20.3*</b><br>( <b>-26.1,-14.4</b> ) | <b>-16.5*</b><br>( <b>-23.5,-9.5</b> ) | <b>-17.2*</b><br>( <b>-29.1,-5.3</b> ) | <b>-9.9*</b><br>( <b>-17.6,-2.2</b> ) | <b>-14.9*</b><br>( <b>-21.9,-7.8</b> ) | <b>-18.3*</b><br>( <b>-25.4,-11.3</b> ) | <b>-15.7*</b><br>( <b>-25.0,-6.4</b> ) | -9.1<br>(-21.3,3.1)                  |
| Age(years)                                     |                                         |                                         |                                         |                                        |                                        |                                       |                                        |                                         |                                        |                                      |
| Leisure time physical activity                 | Ref.                                    | Ref.                                    | Ref.                                    | Ref.                                   | Ref.                                   | Ref.                                  | Ref.                                   | Ref.                                    | Ref.                                   | Ref.                                 |
| Inactive (<30 min/day)                         | 2.9<br>(-7.3,13.0)                      | <b>10.8*</b><br>( <b>2.3,19.2</b> )     | <b>15.3*</b><br>( <b>7.4,23.2</b> )     | <b>15.6*</b><br>( <b>6.0,25.3</b> )    | <b>17.3*</b><br>( <b>2.3,32.3</b> )    | 0.8<br>(-8.4,10.0)                    | 7.7<br>(-0.8,16.2)                     | 7.1<br>(-1.3,15.6)                      | 9.5<br>(-1.7,20.7)                     | 7.0<br>(-7.7,21.7)                   |
| Active (≥30 min/day)                           | 5.9<br>(-6.2,17.9)                      | <b>11.7*</b><br>( <b>1.7,21.7</b> )     | <b>22.2*</b><br>( <b>12.8,31.6</b> )    | <b>22.1*</b><br>( <b>10.6,33.6</b> )   | <b>32.7*</b><br>( <b>14.8,50.5</b> )   | -2.8<br>(-14.6,9.0)                   | 1.4<br>(-9.4,12.3)                     | 7.5<br>(-3.4,18.3)                      | 12.0<br>(-2.3,26.3)                    | 15.8<br>(-3.0,34.6)                  |

\*P value <0.05

**Table S3.** Factors associated with VDBP levels in all men.

| Variable                                       | Univariable model              |                             |                               |                      |                            | Multivariable model    |                               |                            |                       |                       |
|------------------------------------------------|--------------------------------|-----------------------------|-------------------------------|----------------------|----------------------------|------------------------|-------------------------------|----------------------------|-----------------------|-----------------------|
|                                                | Coefficient (95% CI)           |                             |                               |                      |                            | Coefficient (95% CI)   |                               |                            |                       |                       |
|                                                | 10 <sup>th</sup>               | 25 <sup>th</sup>            | 50 <sup>th</sup>              | 75 <sup>th</sup>     | 90 <sup>th</sup>           | 10 <sup>th</sup>       | 25 <sup>th</sup>              | 50 <sup>th</sup>           | 75 <sup>th</sup>      | 90 <sup>th</sup>      |
| Age(years)                                     | <b>-0.4*</b><br>(-0.8,-0.02)   | <b>-0.4*</b><br>(-0.7,0.02) | <b>-0.2</b><br>(-0.7,0.2)     | 0.4<br>(-0.2,0.9)    | 0.3<br>(-0.5,1.2)          | -0.4<br>(-0.8,0.01)    | <b>-0.5*</b><br>(-0.8,-0.1)   | -0.05<br>(-0.5,0.3)        | 0.2<br>(-0.4,0.8)     | 0.6<br>(-0.2,1.3)     |
| Leisure time physical activity                 |                                |                             |                               |                      |                            |                        |                               |                            |                       |                       |
| Inactive (<30 min/day)                         | Ref.                           | Ref.                        | Ref.                          | Ref.                 | Ref.                       | Ref.                   | Ref.                          | Ref.                       | Ref.                  | Ref.                  |
| Active (≥30 min/day)                           | 0.4<br>(-13.0,13.8)            | 2.2<br>(-9.1,13.5)          | -4.5<br>(-17.7,8.6)           | -6.1<br>(-22.8,10.6) | -8.0<br>(-29.2,13.3)       | 2.7<br>(-10.0,15.4)    | -3.0<br>(-14.2,8.2)           | -1.9<br>(-13.8,10.1)       | -5.5<br>(-23.6,12.6)  | -6.4<br>(-28.5,15.7)  |
| Smoking status                                 |                                |                             |                               |                      |                            |                        |                               |                            |                       |                       |
| Normal                                         | Ref.                           | Ref.                        | Ref.                          | Ref.                 | Ref.                       | Ref.                   | Ref.                          | Ref.                       | Ref.                  | Ref.                  |
| Current                                        | 7.7<br>(-10.5,25.9)            | -1.9<br>(-12.7,16.6)        | 3.4<br>(-13.7,20.4)           | 2.5<br>(-19.1,24.2)  | 6.4<br>(-22.1,35.0)        | -1.3<br>(-17.9,15.2)   | 1.4<br>(-13.2,16.0)           | 5.9<br>(-9.6,21.5)         | 4.5<br>(-19.0,28.1)   | 13.4<br>(-15.3,42.1)  |
| Past                                           | -8.5<br>(-23.7,6.7)            | -1.5<br>(-13.7,10.7)        | 9.3<br>(-5.0,23.6)            | 12.0<br>(-6.1,30.2)  | <b>24.4*</b><br>(0.5,48.3) | -7.2<br>(-21.1,6.8)    | 2.3<br>(-10.0,14.6)           | 7.6<br>(-5.5,20.8)         | 8.4<br>(-11.5,28.3)   | 31.0<br>(6.7,55.2)    |
| BMI (kg/m <sup>2</sup> )                       |                                |                             |                               |                      |                            |                        |                               |                            |                       |                       |
| Normal                                         | Ref.                           | Ref.                        | Ref.                          | Ref.                 | Ref.                       | Ref.                   | Ref.                          | Ref.                       | Ref.                  | Ref.                  |
| Overweight                                     | 3.9<br>(-8.6,16.4)             | -3.4<br>(-15.3,8.5)         | <b>-15.5*</b><br>(-28.4,-2.7) | -13.2<br>(-31.2,4.9) | -6.0<br>(-35.0,23.1)       | 3.7<br>(-10.1,17.6)    | -3.5<br>(-15.7,8.7)           | -11.4<br>(-24.4,1.6)       | -11.0<br>(-30.7,8.8)  | -18.6<br>(-42.7,5.5)  |
| Obesity                                        | -12.2<br>(-28.2,3.8)           | -15.6<br>(-30.8,-0.4)       | -11.9<br>(-28.3,4.6)          | -20.7<br>(-43.8,2.3) | -16.2<br>(-53.4,20.9)      | -13.1<br>(-30.9,4.6)   | <b>-21.8*</b><br>(-37.4,-6.1) | -12.8<br>(-29.5,3.9)       | -23.0<br>(-48.3,2.3)  | -33.0<br>(63.9,-2.1)  |
| Total 25-hydroxivitamin D (ng/mL) <sup>a</sup> | 0.3<br>(-0.7,1.3)              | 0.1<br>(-0.6,0.9)           | 0.2<br>(-0.8,1.1)             | -0.5<br>(-1.6,0.7)   | -0.5<br>(-2.2,1.1)         | 0.2<br>(-0.7,1.1)      | -0.2<br>(-1.0,0.6)            | -0.4<br>(-1.3,0.5)         | -0.9<br>(-2.3,0.4)    | -0.9<br>(-2.5,0.7)    |
| Vitamin D intake (UI/day) <sup>a</sup>         | -0.0004<br>(-0.03,0.03)        | 0.001<br>(-0.02,0.03)       | 0.01<br>(-0.02,0.04)          | 0.02<br>(-0.02,0.05) | 0.002<br>(-0.05,0.05)      | -0.003<br>(-0.03,0.03) | -0.006<br>(-0.03,0.02)        | 0.009<br>(-0.02,0.04)      | 0.02<br>(-0.02,0.06)  | 0.004<br>(-0.05,0.05) |
| Alcohol(g/day) <sup>a</sup>                    | 0.003<br>(-0.23,0.24)          | 0.02<br>(-0.17,0.21)        | -0.04<br>(-0.27,0.19)         | 0.25<br>(-0.05,0.55) | 0.30<br>(-0.08,0.67)       | 0.05<br>(-0.16,0.26)   | 0.02<br>(-0.17,0.20)          | -0.04<br>(-0.24,0.16)      | -0.02<br>(-0.32,0.28) | 0.07<br>(-0.29,0.44)  |
| rs4588                                         |                                |                             |                               |                      |                            |                        |                               |                            |                       |                       |
| CC                                             | Ref.                           | Ref.                        | Ref.                          | Ref.                 | Ref.                       | Ref.                   | Ref.                          | Ref.                       | Ref.                  | Ref.                  |
| CA+AA                                          | <b>-11.1*</b><br>(-22.0,-0.19) | -7.6<br>(-17.5,2-4)         | <b>-17.5*</b><br>(-28.0,-6.9) | -12.5<br>(-28.3,3.4) | -9.9<br>(-31.6,11.8)       | -9.0<br>(-21.9,3.9)    | -10.1<br>(-21.5,1.3)          | -11.2<br>(-23.4,0.9)       | -14.6<br>(-33.0,3.8)  | -13.4<br>(-35.9,9.0)  |
| rs7041                                         |                                |                             |                               |                      |                            |                        |                               |                            |                       |                       |
| TT                                             | Ref.                           | Ref.                        | Ref.                          | Ref.                 | Ref.                       | Ref.                   | Ref.                          | Ref.                       | Ref.                  | Ref.                  |
| TG                                             | 2.9<br>(-12.1,18.0)            | 4.9<br>(-8.3,18.1)          | <b>20.1*</b><br>(6.1,34.2)    | 16.1<br>(-4.0,36.3)  | 12.6<br>(-20.7,45.9)       | 4.5<br>(-11.0,19.9)    | 4.0<br>(-9.6,17.6)            | 12.5<br>(-2.0,27.1)        | 15.9<br>(-6.2,37.9)   | 13.2<br>(-13.6,40.1)  |
| GG                                             | 9.4<br>(-8.8,27.7)             | 6.3<br>(-9.7,22.3)          | <b>25.3*</b><br>(8.3,42.3)    | 18.6<br>(-5.9,43.0)  | 16.7<br>(-23.6,57.1)       | 2.7<br>(-17.4,22.7)    | 4.1<br>(13.6,21.8)            | <b>19.9*</b><br>(1.0,38.8) | 14.9<br>(-13.7,43.5)  | 19.5<br>(-15.4,54.5)  |

\*P value <0.05

**Table S4.** Factors associated with VDBP levels in all women.

| Variable                                       | Univariable model             |                                |                                |                               |                               | Multivariable model           |                               |                                |                               |                                |
|------------------------------------------------|-------------------------------|--------------------------------|--------------------------------|-------------------------------|-------------------------------|-------------------------------|-------------------------------|--------------------------------|-------------------------------|--------------------------------|
|                                                | Coefficient (95% CI)          |                                |                                |                               |                               | Coefficient (95% CI)          |                               |                                |                               |                                |
|                                                | 10 <sup>th</sup>              | 25 <sup>th</sup>               | 50 <sup>th</sup>               | 75 <sup>th</sup>              | 90 <sup>th</sup>              | 10 <sup>th</sup>              | 25 <sup>th</sup>              | 50 <sup>th</sup>               | 75 <sup>th</sup>              | 90 <sup>th</sup>               |
| Age(years)                                     | <b>-0.8*</b><br>(-1.1,-0.5)   | <b>-0.7*</b><br>(-1.0,-0.4)    | <b>-0.6*</b><br>(-0.8,-0.3)    | <b>-0.4*</b><br>(-0.7,-0.03)  | <b>-0.9*</b><br>(-1.4,-0.4)   | <b>-0.76*</b><br>(-1.3,-0.2)  | <b>-0.7*</b><br>(-1.2,0.2)    | <b>-1.0*</b><br>(-1.4,-0.5)    | <b>-0.6*</b><br>(-1.2,-0.1)   | <b>-1.3*</b><br>(-2.0,0.7)     |
| Leisure time physical activity                 | <b>-16.1*</b><br>(-25.9,-6.3) | -8.6<br>(-18.4,1.3)            | -5.8<br>(-14.9,3.3)            | -6.4<br>(-16.4,3.4)           | <b>-23.1*</b><br>(-36.8,-9.4) | -3.8<br>(-19.5,11.9)          | 6.4<br>(-7.8,20.7)            | 12.4<br>(-0.4,25.3)            | 6.0<br>(-11.1,23.1)           | 12.9<br>(-6.8,32.6)            |
| Inactive (<30 min/day)                         |                               |                                |                                |                               |                               |                               |                               |                                |                               |                                |
| Active (≥30 min/day)                           | Ref.                          | Ref.                           | Ref.                           | Ref.                          | Ref.                          | Ref.                          | Ref.                          | Ref.                           | Ref.                          | Ref.                           |
| Smoking status                                 | 0.4<br>(-12.3,13.1)           | -6.5<br>(-16.8,3.8)            | -6.0<br>(-15.8,3.8)            | 1.1<br>(-8.8,11.1)            | -6.6<br>(-25.2,12.0)          | 0.9<br>(-10.4,12.2)           | -4.2<br>(-14.4,6.1)           | -6.1<br>(-15.3,3.1)            | -1.5<br>(-13.7,10.8)          | -3.2<br>(-17.4,10.9)           |
| Normal                                         |                               |                                |                                |                               |                               |                               |                               |                                |                               |                                |
| Current                                        | Ref.                          | Ref.                           | Ref.                           | Ref.                          | Ref.                          | Ref.                          | Ref.                          | Ref.                           | Ref.                          | Ref.                           |
| Past                                           | -7.0<br>(-27.7,13.7)          | -1.7<br>(-19.5,16.1)           | -14.2<br>(-30.4,2.0)           | -2.3<br>(-19.9,15.3)          | -12.6<br>(-41.2,16.0)         | -2.2<br>(-21.3,16.9)          | -8.8<br>(-25.9,8.9)           | -17.5<br>(-33.1,1.8)           | -1.6<br>(-22.5,19.2)          | 2.4<br>(-21.6,26.4)            |
| BMI (kg/m <sup>2</sup> )                       | -0.4<br>(-14.0,13.2)          | 1.1<br>(-10.5,12.8)            | 0.9<br>(-9.7,11.5)             | 2.6<br>(-8.9,14.2)            | -4.0<br>(-22.7,14.8)          | 0.5<br>(-11.8,12.9)           | 1.6<br>(-9.6,12.9)            | -1.0<br>(-11.9,9.1)            | 1.3<br>(-12.1,14.8)           | -3.2<br>(-17.4,10.9)           |
| Normal                                         |                               |                                |                                |                               |                               |                               |                               |                                |                               |                                |
| Overweight                                     | Ref.                          | Ref.                           | Ref.                           | Ref.                          | Ref.                          | Ref.                          | Ref.                          | Ref.                           | Ref.                          | Ref.                           |
| Obesity                                        | -11.2<br>(-23.5,1.0)          | -10.7<br>(-21.4,0.01)          | -3.9<br>(-14.4,6.7)            | -0.5<br>(-11.5,10.5)          | -15.3<br>(-32.9,2.3)          | -5.3<br>(-17.4,6.7)           | -4.6<br>(-15.6,6.4)           | 2.7<br>(-7.2,12.6)             | 3.9<br>(-9.3,17.0)            | 5.6<br>(-9.6,20.7)             |
| Total 25-hydroxivitamin D (ng/mL) <sup>a</sup> | -3.8<br>(-17.4,9.8)           | -2.2<br>(-14.1,9.7)            | -0.4<br>(-12.1,11.4)           | 0.9<br>(-11.3,13.2)           | -7.9<br>(-27.5,11.7)          | -5.8<br>(-19.3,7.7)           | -3.0<br>(-15.3,9.3)           | 1.5<br>(-9.5,12.6)             | 7.8<br>(-6.9,22.5)            | 3.5<br>(-13.5,20.4)            |
| Vitamin D intake (UI/day) <sup>a</sup>         | 0.7<br>(-0.04,1.4)            | 0.6<br>(-0.9,1.3)              | 0.3<br>(-0.4,1.0)              | -0.3<br>(-1.1,0.4)            | <b>-1.5*</b><br>(-2.7,-0.3)   | 0.5<br>(-0.4,1.3)             | 0.4<br>(-0.4,1.1)             | 0.08<br>(-0.6,0.7)             | -0.5<br>(-1.3,0.4)            | -1.2<br>(-2.3,-0.2)            |
| Alcohol(g/day) <sup>a</sup>                    | 0.004<br>(-0.03,0.04)         | -0.01<br>(-0.04,0.02)          | -0.003<br>(-0.03,0.03)         | -0.02<br>(-0.05,0.01)         | -0.03<br>(-0.09,0.02)         | 0.02<br>(-0.009,0.06)         | -0.007<br>(-0.04,0.02)        | -0.01<br>(-0.04,0.01)          | -0.02<br>(-0.05,0.02)         | -0.009<br>(-0.05,0.03)         |
| rs4588                                         | 0.07<br>(-1.2,1.3)            | 0.1<br>(-1.0,1.2)              | -0.1<br>(-1.1,0.8)             | -0.2<br>(-1.2,0.9)            | -0.3<br>(-2.1,1.6)            | 0.3<br>(-0.9,1.4)             | 0.13<br>(-0.9,1.2)            | 0.4<br>(-0.5,1.4)              | -0.5<br>(-1.7,0.8)            | -0.45<br>(-1.9,1.0)            |
| CC                                             |                               |                                |                                |                               |                               |                               |                               |                                |                               |                                |
| CA+AA                                          | Ref.                          | Ref.                           | Ref.                           | Ref.                          | Ref.                          | Ref.                          | Ref.                          | Ref.                           | Ref.                          | Ref.                           |
| rs7041                                         | -8.4<br>(-19.4,2.6)           | <b>-20.4*</b><br>(-27.9,-12.9) | <b>-19.4*</b><br>(-27.1,-11.7) | <b>-15.7*</b><br>(-24.4,-6.9) | <b>-19.2*</b><br>(-33.4,5.0)  | <b>-10.8*</b><br>(-21.0,-0.6) | <b>-17.5*</b><br>(-26.7,-8.2) | <b>-18.7*</b><br>(-27.0,-10.3) | <b>-12.8*</b><br>(-23.9,-1.7) | <b>-13.6*</b><br>(-26.5,-0.82) |
| TT                                             |                               |                                |                                |                               |                               |                               |                               |                                |                               |                                |
| TG                                             | Ref.                          | Ref.                           | Ref.                           | Ref.                          | Ref.                          | Ref.                          | Ref.                          | Ref.                           | Ref.                          | Ref.                           |
| GG                                             | 1.9<br>(-10.8,14.6)           | <b>12.9*</b><br>(2.2,23.6)     | <b>14.4*</b><br>(4.5,24.4)     | <b>12.3*</b><br>(0.6,24.1)    | 14.0<br>(-3.4,31.4)           | -5.1<br>(-17.4,7.2)           | 5.5<br>(-5.7,16.7)            | 5.8<br>(-4.3,15.9)             | 10.0<br>(-3.4,23.4)           | 2.4<br>(-13.1,17.8)            |
| Age(years)                                     | 0.1<br>(-14.9,15.1)           | <b>13.9*</b><br>(1.3,26.5)     | <b>21.5*</b><br>(9.8,33.2)     | <b>20.5*</b><br>(6.7,34.4)    | <b>32.1*</b><br>(11.6,53.6)   | -10.9<br>(-26.5,4.6)          | -2.2<br>(-16.4,11.9)          | 6.7<br>(-6.0,19.4)             | 14.4<br>(-2.5,31.4)           | 18.1<br>(-1.5,37.6)            |

\*P value &lt;0.05

**Table S5.** Factors associated with VDBP levels in premenopausal women.

| Variable                                       | Univariable model             |                                |                                |                            |                             | Multivariable model         |                               |                               |                             |                             |
|------------------------------------------------|-------------------------------|--------------------------------|--------------------------------|----------------------------|-----------------------------|-----------------------------|-------------------------------|-------------------------------|-----------------------------|-----------------------------|
|                                                | Coefficient (95% CI)          |                                |                                |                            |                             | Coefficient (95% CI)        |                               |                               |                             |                             |
|                                                | 10 <sup>th</sup>              | 25 <sup>th</sup>               | 50 <sup>th</sup>               | 75 <sup>th</sup>           | 90 <sup>th</sup>            | 10 <sup>th</sup>            | 25 <sup>th</sup>              | 50 <sup>th</sup>              | 75 <sup>th</sup>            | 90 <sup>th</sup>            |
| Age(years)                                     | <b>-0.9*</b><br>(-1.5,0.2)    | <b>-0.9*</b><br>(-1.5,-0.3)    | <b>-0.9*</b><br>(-1.5,-0.3)    | 0.03<br>(-0.8,0.9)         | -0.4<br>(-1.3,0.6)          | <b>-1.0*</b><br>(-1.7,-0.2) | <b>-0.7*</b><br>(-1.3,-0.1)   | <b>-0.07*</b><br>(-1.3,-0.1)  | -0.3<br>(-1.0,0.6)          | -0.2<br>(-1.3,0.9)          |
| Leisure time physical activity                 |                               |                                |                                |                            |                             |                             |                               |                               |                             |                             |
| Inactive (<30 min/day)                         | Ref.                          | Ref.                           | Ref.                           | Ref.                       | Ref.                        | Ref.                        | Ref.                          | Ref.                          | Ref.                        | Ref.                        |
| Active (≥30 min/day)                           | -0.9<br>(-17.3,15.6)          | 2.9<br>(-12.7,18.5)            | 1.8<br>(-13.8,17.4)            | 2.7<br>(-16.1,21.5)        | 8.7<br>(-14.3,31.8)         | -1.8<br>(-20.0,16.3)        | 2.7<br>(-12.1,17.5)           | 5.6<br>(-8.8,19.9)            | 1.01<br>(-18.2,20.2)        | -3.4<br>(-29.9,23.1)        |
| Smoking status                                 |                               |                                |                                |                            |                             |                             |                               |                               |                             |                             |
| Normal                                         | Ref.                          | Ref.                           | Ref.                           | Ref.                       | Ref.                        | Ref.                        | Ref.                          | Ref.                          | Ref.                        | Ref.                        |
| Current                                        | -6.0<br>(-28.2,16.2)          | -1.1<br>(-18.7,16.4)           | 7.9<br>(-9.2,24.9)             | 3.2<br>(-17.1,23.5)        | 4.2<br>(-23.9,32.3)         | -8.4<br>(-38.4,21.6)        | -12.4<br>(-36.9,11.9)         | -19.9<br>(-18.6,14.2)         | 13.6<br>(-18.1,45.3)        | 11.0<br>(-32.7,54.8)        |
| Past                                           | 4.8<br>(-24.8,34.4)           | -3.8<br>(-27.3,19.7)           | -11.1<br>(-34.0,11.6)          | 18.5<br>(-8.6,45.6)        | -16.2<br>(-53.8,21.3)       | -7.5<br>(-28.3,13.4)        | -6.0<br>(-23.0,10.9)          | -2.2<br>(-43.5,3.8)           | -5.4<br>(-27.4,16.6)        | -1.5<br>(-31.9,28.9)        |
| BMI (kg/m <sup>2</sup> )                       |                               |                                |                                |                            |                             |                             |                               |                               |                             |                             |
| Normal                                         | Ref.                          | Ref.                           | Ref.                           | Ref.                       | Ref.                        | Ref.                        | Ref.                          | Ref.                          | Ref.                        | Ref.                        |
| Overweight                                     | 0.9<br>(-15.3,17.1)           | -7.4<br>(-21.4,6.5)            | -14.8<br>(-30.5,0.9)           | -7.8<br>(-28.9,13.3)       | -27.4*<br>(-52.1,-2.7)      | 3.7<br>(-15.7,23.1)         | -3.8<br>(-19.6,12.0)          | -1.3<br>(-16.6,14.0)          | -5.8<br>(-26.3,14.7)        | -26.2<br>(-54.5,2.0)        |
| Obesity                                        | -17.1<br>(-36.2,2.1)          | <b>-20.7*</b><br>(-37.2,-4.2)  | <b>-23.4*</b><br>(-42.0,-4.8)  | 0.8<br>(-24.2,25.8)        | -5.3<br>(-34.5,24.0)        | -3.6<br>(-26.4,19.2)        | -9.1<br>(-27.7,9.4)           | -16.0<br>(-34.0,2.0)          | 0.7<br>(-23.4,24.8)         | -8.7<br>(-41.9,24.6)        |
| Total 25-hydroxyvitamin D (ng/mL) <sup>a</sup> | 0.6<br>(-0.6,1.9)             | 0.6<br>(-0.5,1.7)              | -0.1<br>(-1.3,1.0)             | -0.9<br>(-2.4,0.6)         | <b>-1.9*</b><br>(-3.5,-0.3) | 0.6<br>(-0.7,2.0)           | 0.2<br>(-1.0,1.3)             | 0.05<br>(-1.0,1.1)            | <b>-1.9*</b><br>(-3.3,-0.4) | <b>-2.5*</b><br>(-4.5,-0.5) |
| Vitamin D intake (UI/day) <sup>a</sup>         | -0.04<br>(-0.10,0.02)         | -0.01<br>(-0.06,0.04)          | 0.002<br>(-0.05,0.05)          | -0.03<br>(-0.09,0.03)      | -0.04<br>(-0.12,0.03)       | -0.03<br>(-0.09,0.03)       | -0.01<br>(-0.05,0.04)         | -0.03<br>(-0.07,0.02)         | -0.03<br>(-0.1,0.03)        | -0.08<br>(-0.16,0.01)       |
| Alcohol(g/day) <sup>a</sup>                    | 0.5<br>(-1.2,2.2)             | 0.7<br>(-0.8,2.2)              | 0.1<br>(-1.5,1.6)              | 0.6<br>(-1.3,2.4)          | -0.02<br>(-2.4,2.4)         | 1.2<br>(-0.7,3.1)           | 1.3<br>(-0.3,2.8)             | 1.2<br>(-0.3,2.7)             | 0.9<br>(-1.1,2.9)           | 1.0<br>(-1.8,3.7)           |
| rs4588                                         |                               |                                |                                |                            |                             |                             |                               |                               |                             |                             |
| CC                                             | Ref.                          | Ref.                           | Ref.                           | Ref.                       | Ref.                        | Ref.                        | Ref.                          | Ref.                          | Ref.                        | Ref.                        |
| CA+AA                                          | <b>-18.0*</b><br>(-33.8,-2.1) | <b>-23.6*</b><br>(-35.1,-12.1) | <b>-22.7*</b><br>(-35.0,-10.3) | -16.0<br>(-33.5,1.6)       | -6.7<br>(-26.6,13.2)        | -15.1<br>(-32.1,1.9)        | <b>-19.4*</b><br>(-33.2,-5.6) | <b>-19.3*</b><br>(-32.7,-5.9) | -13.8<br>(-31.8,4.2)        | -3.1<br>(-27.9,21.7)        |
| rs7041                                         |                               |                                |                                |                            |                             |                             |                               |                               |                             |                             |
| TT                                             | Ref.                          | Ref.                           | Ref.                           | Ref.                       | Ref.                        | Ref.                        | Ref.                          | Ref.                          | Ref.                        | Ref.                        |
| TG                                             | 4.3<br>(-15.6,24.1)           | <b>17.0*</b><br>(1.3,32.6)     | <b>24.3*</b><br>(7.3,41.3)     | <b>23.0*</b><br>(2.1,43.9) | <b>37.3*</b><br>(12.3,62.2) | -2.2<br>(-22.3,17.9)        | 7.9<br>(-8.5,24.3)            | 10.2<br>(-5.6,26.1)           | 19.6<br>(-1.7,40.9)         | <b>32.3*</b><br>(3.0,61.7)  |
| GG                                             | 10.8<br>(-13.5,35.2)          | <b>19.3*</b><br>(0.1,38.5)     | <b>31.8*</b><br>(10.8,52.7)    | <b>28.2*</b><br>(2.6,53.9) | <b>41.4*</b><br>(10.9,72.0) | -8.9<br>(-35.0,17.2)        | -0.004<br>(-21.2,21.2)        | 11.6<br>(-9.0,32.2)           | 25.0<br>(-2.7,52.6)         | 30.1<br>(-8.0,68.1)         |

\*P value &lt;0.05

**Table S6.** Factors associated with VDBP levels in post-menopausal women.

| Variable                                       | Univariable model    |                                      |                                       |                                      |                                    | Multivariable model   |                                      |                                      |                                    |                                    |
|------------------------------------------------|----------------------|--------------------------------------|---------------------------------------|--------------------------------------|------------------------------------|-----------------------|--------------------------------------|--------------------------------------|------------------------------------|------------------------------------|
|                                                | Coefficient (95% CI) |                                      |                                       |                                      |                                    | Coefficient (95% CI)  |                                      |                                      |                                    |                                    |
|                                                | 10 <sup>h</sup>      | 25 <sup>th</sup>                     | 50 <sup>th</sup>                      | 75 <sup>th</sup>                     | 90 <sup>th</sup>                   | 10 <sup>h</sup>       | 25 <sup>th</sup>                     | 50 <sup>th</sup>                     | 75 <sup>th</sup>                   | 90 <sup>th</sup>                   |
| Age(years)                                     | -0.6<br>(-1.2,0.1)   | <b>-0.9*</b><br><b>(-1.6,-0.3)</b>   | <b>-1.0*</b><br><b>(-1.6,-0.3)</b>    | <b>-1.2*</b><br><b>(-1.9,-0.6)</b>   | <b>-1.2*</b><br><b>(-2.4,-0.1)</b> | -0.7<br>(-1.5,0.2)    | <b>-0.9*</b><br><b>(-1.6,-0.1)</b>   | <b>-1.2*</b><br><b>(-1.8,-0.6)</b>   | <b>-1.4*</b><br><b>(-2.2,-0.6)</b> | <b>-1.7*</b><br><b>(-2.8,-0.7)</b> |
| Leisure time physical activity                 |                      |                                      |                                       |                                      |                                    |                       |                                      |                                      |                                    |                                    |
| Inactive (<30 min/day)                         | Ref.                 | Ref.                                 | Ref.                                  | Ref.                                 | Ref.                               | Ref.                  | Ref.                                 | Ref.                                 | Ref.                               | Ref.                               |
| Active (≥30 min/day)                           | 3.1<br>(-9.8,16.1)   | -11.2<br>(-26.2,3.8)                 | -9.9<br>(-22.4,2.7)                   | -0.7<br>(-14.9,13.6)                 | -2.7<br>(-24.2,18.8)               | 2.3<br>(-14.4,19.0)   | -7.9<br>(-23.1,7.4)                  | <b>-18.3*</b><br><b>(-30.8,-5.8)</b> | -8.9<br>(-25.0,7.2)                | -11.1<br>(-31.8,9.6)               |
| Smoking status                                 |                      |                                      |                                       |                                      |                                    |                       |                                      |                                      |                                    |                                    |
| Normal                                         | Ref.                 | Ref.                                 | Ref.                                  | Ref.                                 | Ref.                               | Ref.                  | Ref.                                 | Ref.                                 | Ref.                               | Ref.                               |
| Current                                        | -23.6<br>(-46.1,1.9) | -15.2<br>(-42.7,12.3)                | -16.8<br>(-39.5,6.0)                  | -4.3<br>(-29.9,21.3)                 | -12.5<br>(-53.5,28.5)              | -21.3<br>(-50.3,7.6)  | -4.0<br>(-20.4,12.5)                 | <b>-26.6*</b><br><b>(-48.2,-4.9)</b> | -22.8<br>(-50.6,5.0)               | -9.2<br>(-45.1,26.6)               |
| Past                                           | 8.9<br>(-6.3,24.1)   | 7.4<br>(-9.0,23.9)                   | 1.9<br>(-11.6,15.5)                   | 1.8<br>(-13.4,17.1)                  | -2.1<br>(-26.6,22.4)               | 7.4<br>(-10.1,24.9)   | 5.1<br>(-12.9,23.2)                  | 5.6<br>(-7.5,18.7)                   | 2.5<br>(-14.3,19.3)                | 6.2<br>(-15.5,27.9)                |
| BMI (kg/m <sup>2</sup> )                       |                      |                                      |                                       |                                      |                                    |                       |                                      |                                      |                                    |                                    |
| Normal                                         | Ref.                 | Ref.                                 | Ref.                                  | Ref.                                 | Ref.                               | Ref.                  | Ref.                                 | Ref.                                 | Ref.                               | Ref.                               |
| Overweight                                     | -3.4<br>(-19.4,12.6) | -11.6<br>(-27.7,4.4)                 | 2.3<br>(-12.4,17.0)                   | 7.8<br>(-8.6,24.1)                   | 9.6<br>(-13.5,32.8)                | -15.0<br>(-33.0,3.0)  | -4.0<br>(-20.4,12.5)                 | 7.0<br>(-6.5,20.5)                   | 14.6<br>(-2.7,32.0)                | 12.4<br>(-10.0,34.7)               |
| Obesity                                        | 10.3<br>(-6.9,27.6)  | 6.7<br>(-7.6,27.0)                   | 9.3<br>(-6.6,25.1)                    | 6.8<br>(-10.9,24.4)                  | 9.6<br>(-15.4,34.5)                | -0.2<br>(-20.0,19.5)  | 5.1<br>(12.9,23.2)                   | 8.8<br>(-6.0,23.6)                   | 17.9<br>(-1.1,36.9)                | 7.0<br>(-17.5,31.4)                |
| Total 25-hydroxyvitamin D (ng/mL) <sup>a</sup> | 0.9<br>(-0.1,1.9)    | 0.8<br>(-0.2,1.8)                    | 0.6<br>(-0.3,1.5)                     | 0.2<br>(-0.8,1.2)                    | -0.3<br>(-1.7,1.1)                 | 0.6<br>(-0.6,1.7)     | 0.5<br>(-0.6,1.5)                    | 0.6<br>(-0.3,1.4)                    | 0.3<br>(-0.8,1.4)                  | -1.0<br>(-2.4,0.4)                 |
| Vitamin D intake (UI/day) <sup>a</sup>         | 0.02<br>(-0.02,0.06) | -0.01<br>(-0.05,0.03)                | -0.003<br>(-0.04,0.03)                | 0.001<br>(-0.04,0.04)                | -0.01<br>(-0.07,0.05)              | 0.04<br>(-0.007,0.09) | 0.008<br>(-0.03,0.05)                | 0.006<br>(-0.03,0.04)                | 0.0002<br>(-0.04,0.05)             | 0.02<br>(-0.04,0.08)               |
| Alcohol(g/day) <sup>a</sup>                    | 0.007<br>(-1.4,1.4)  | -0.44<br>(-2.0,1.1)                  | -0.34<br>(-1.7,1.0)                   | -0.69<br>(-2.1,0.7)                  | -1.5<br>(-3.6,0.5)                 | -0.9<br>(-2.6,0.7)    | -0.07<br>(-1.6,1.4)                  | -0.1<br>(-1.4,1.1)                   | -0.7<br>(-2.3,0.9)                 | -1.7<br>(-3.7,0.4)                 |
| rs4588                                         |                      |                                      |                                       |                                      |                                    |                       |                                      |                                      |                                    |                                    |
| CC                                             | Ref.                 | Ref.                                 | Ref.                                  | Ref.                                 | Ref.                               | Ref.                  | Ref.                                 | Ref.                                 | Ref.                               | Ref.                               |
| CA+AA                                          | -1.6<br>(-14.0,10.8) | <b>-18.3*</b><br><b>(-28.7,-7.8)</b> | <b>-21.2*</b><br><b>(-31.1,-11.3)</b> | <b>-15.1*</b><br><b>(-26.2,-4.1)</b> | -16.2<br>(-32.7,0.31)              | -11.0<br>(-25.5,3.6)  | <b>-15.7*</b><br><b>(-29.0,-2.4)</b> | <b>-20.3*</b><br><b>(-31.2,-9.4)</b> | -13.4<br>(-27.5,0.6)               | -15.9<br>(-22.9,2.2)               |
| rs7041                                         |                      |                                      |                                       |                                      |                                    |                       |                                      |                                      |                                    |                                    |
| TT                                             | Ref.                 | Ref.                                 | Ref.                                  | Ref.                                 | Ref.                               | Ref.                  | Ref.                                 | Ref.                                 | Ref.                               | Ref.                               |
| TG                                             | 1.4<br>(-11.8,14.7)  | 9.7<br>(-6.4,25.8)                   | 8.6<br>(-4.6,21.9)                    | 4.0<br>(-10.8,18.7)                  | -0.7<br>(-23.6,22.1)               | -4.1<br>(-21.9,13.7)  | 2.5<br>(-13.7,18.9)                  | 3.2<br>(-10.1,16.6)                  | -3.9<br>(-21.1,13.2)               | -4.7<br>(-26.8,17.3)               |
| GG                                             | -2.6<br>(-17.9,12.6) | 15.9<br>(-2.6,34.4)                  | <b>17.0*</b><br><b>(1.8,32.2)</b>     | 12.6<br>(-4.3,29.6)                  | 16.4<br>(-9.9,42.7)                | 10.1<br>(-32.2,12.0)  | 2.9<br>(-17.3,23.0)                  | 0.4<br>(-16.1,19.7)                  | 0.7<br>(-20.6,21.9)                | 15.7<br>(-11.7,43.1)               |

\*P value &lt;0.05

**Table S7.** Factors associated with VDBP levels in normal VitD levels.

| Variable                                      | Univariable model             |                               |                                |                               |                        | Multivariable model           |                               |                                |                               |                        |
|-----------------------------------------------|-------------------------------|-------------------------------|--------------------------------|-------------------------------|------------------------|-------------------------------|-------------------------------|--------------------------------|-------------------------------|------------------------|
|                                               | Coefficient (95% CI)          |                               |                                |                               |                        | Coefficient (95% CI)          |                               |                                |                               |                        |
|                                               | 10 <sup>th</sup>              | 25 <sup>th</sup>              | 50 <sup>th</sup>               | 75 <sup>th</sup>              | 90 <sup>th</sup>       | 10 <sup>th</sup>              | 25 <sup>th</sup>              | 50 <sup>th</sup>               | 75 <sup>th</sup>              | 90 <sup>th</sup>       |
| Age(years)                                    | <b>-0.6*</b><br>(-1.0,-0.3)   | <b>-0.5*</b><br>(-0.8,-0.2)   | <b>-0.4*</b><br>(-0.7,0.1)     | -0.2<br>(-0.5,0.2)            | -0.5<br>(-1.1,0.1)     | -0.4<br>(-0.8,0.1)            | <b>-0.4*</b><br>(-0.8,-0.02)  | <b>-0.6*</b><br>(-1.0,0.2)     | <b>-0.3</b><br>(-0.8,0.1)     | -0.5<br>(-1.1,0.1)     |
| Sex                                           |                               |                               |                                |                               |                        |                               |                               |                                |                               |                        |
| Men                                           | Ref.<br>2.4                   | Ref.<br><b>9.6*</b>           | Ref.<br><b>12.6*</b>           | Ref.<br><b>18.1*</b>          | Ref.<br>17.3           | Ref.<br><b>18.5*</b>          | Ref.<br><b>-0.4*</b>          | Ref.<br><b>-0.6*</b>           | Ref.<br>11.6                  | Ref.<br>15.4           |
| Women                                         | (-8.5,13.2)                   | <b>(0.05,19.1)</b>            | <b>(2.3,23.0)</b>              | <b>(8.5,27.7)</b>             | (-0.9,35.4)            | <b>(3.3,33.7)</b>             | <b>(-0.8,-0.02)</b>           | <b>(-1.0,0.2)</b>              | (-3.9,27.0)                   | (-3.0,33.9)            |
| Menopause                                     | <b>-15.3*</b><br>(-25.1,-5.5) | 1.3<br>(-7.8,10.4)            | 4.9<br>(-5.0,14.9)             | 5.7<br>(-4.4,15.7)            | -1.9<br>(-21.3,17.5)   | <b>-22.6*</b><br>(-39.6,-5.6) | 10.1<br>(-2.6,22.8)           | <b>12.9*</b><br>(0.5,25.3)     | 7.3<br>(-10.0,24.6)           | -0.09<br>(-20.7,20.6)  |
| Leisure time physical activity                |                               |                               |                                |                               |                        |                               |                               |                                |                               |                        |
| Inactive (<30 min/day)                        | Ref.                          | Ref.                          | Ref.                           | Ref.                          | Ref.                   | Ref.                          | Ref.                          | Ref.                           | Ref.                          | Ref.                   |
| Active (≥30 min/day)                          | -0.9<br>(-11.8,10.1)          | -4.1<br>(-13.3,5.0)           | -8.5<br>(-18.3,1.2)            | -2.9<br>(13.2,7.4)            | -2.2<br>(-22.6,18.3)   | -1.6<br>(-13.1,9.9)           | 0.2<br>(-13.4,5.8)            | -8.5<br>(-17.8,0.9)            | -0.7<br>(-12.4,11.0)          | -7.6<br>(-21.5,6.3)    |
| Smoking status                                |                               |                               |                                |                               |                        |                               |                               |                                |                               |                        |
| Normal                                        | Ref.<br>3.5                   | Ref.<br>2.4                   | Ref.<br>-11.4                  | Ref.<br>-1.4                  | Ref.<br>-8.5           | Ref.<br>-2.7                  | Ref.<br>-3.0                  | Ref.<br>-5.1                   | Ref.<br>0.5                   | Ref.<br>-5.1           |
| Current                                       | (-13.3,20.4)                  | (-11.2,16.0)                  | (-25.7,2.8)                    | (-17.2,14.4)                  | (-38.4,21.3)           | (-19.6,14.2)                  | (-17.2,11.1)                  | (-18.9,8.6)                    | (-16.7,17.7)                  | (-25.6,15.4)           |
| Past                                          | -2.6<br>(-15.2,10.0)          | 2.0<br>(-8.1,12.1)            | -5.1<br>(-15.7,5.5)            | 2.1<br>(-9.7,13.8)            | -2.7<br>(-24.9,19.5)   | 0.02<br>(-12.4,12.4)          | -0.05<br>(-10.4,10.3)         | 1.8<br>(-8.4,11.9)             | 3.2<br>(-9.4,15.8)            | -0.6<br>(-15.6,14.5)   |
| BMI (kg/m <sup>2</sup> )                      |                               |                               |                                |                               |                        |                               |                               |                                |                               |                        |
| Normal                                        | Ref.                          | Ref.                          | Ref.                           | Ref.                          | Ref.                   | Ref.                          | Ref.                          | Ref.                           | Ref.                          | Ref.                   |
| Overweight                                    | -6.9<br>(-17.3,3.8)           | -6.1<br>(-16.1,3.9)           | -9.9<br>(-20.5,0.7)            | -6.1<br>(-17.7,5.6)           | -9.1<br>(-29.0,10.7)   | 2.6<br>(-9.8,14.9)            | -5.1<br>(-15.5,5.2)           | -1.1<br>(-11.1,9.0)            | -5.1<br>(-17.6,7.5)           | -7.4<br>(-22.4,7.5)    |
| Obesity                                       | -6.1<br>(-18.8,6.7)           | -0.1<br>(-12.0,11.8)          | -1.3<br>(-13.9,11.3)           | -2.6<br>(-16.4,11.2)          | -7.6<br>(-31.2,16.0)   | -4.2<br>(-19.0,10.7)          | -1.6<br>(-14.0,10.8)          | 1.8<br>(-10.2,13.9)            | -3.5<br>(-18.6,11.5)          | -8.1<br>(-26.1,9.9)    |
| Total 25-hydroxvitamin D (ng/mL) <sup>a</sup> | 0.03<br>(-1.0,1.01)           | 0.34<br>(-0.49,1.17)          | 0.28<br>(-0.62,1.18)           | 0.05<br>(-0.92,1.01)          | -1.28<br>(-2.89,0.33)  | -0.09<br>(-1.16,1.00)         | 0.27<br>(-0.62,1.16)          | 0.20<br>(-0.66,1.06)           | -0.18<br>(-1.3,0.9)           | -1.4<br>(-2.7,-0.1)*   |
| Vitamin D intake (UI/day) <sup>a</sup>        | 0.0009<br>(-0.03,0.03)        | 0.003<br>(-0.02,0.03)         | 0.003<br>(-0.02,0.03)          | 0.003<br>(-0.02,0.03)         | 0.0002<br>(-0.05,0.05) | 0.006<br>(-0.02,0.03)         | 0.003<br>(-0.02,0.03)         | 0.009<br>(-0.01,0.03)          | 0.005<br>(-0.02,0.03)         | -0.005<br>(-0.04,0.03) |
| Alcohol(g/day) <sup>a</sup>                   | -0.02<br>(-0.3,0.3)           | 0.01<br>(-0.2,0.2)            | -0.05<br>(-0.3,0.2)            | -0.1<br>(-0.4,0.1)            | -0.2<br>(-0.7,0.3)     | 0.05<br>(-0.22,0.31)          | -0.008<br>(-0.23,0.21)        | -0.07<br>(-0.28,0.15)          | -0.10<br>(-0.37,0.16)         | -0.10<br>(-0.42,0.22)  |
| rs4588                                        |                               |                               |                                |                               |                        |                               |                               |                                |                               |                        |
| CC                                            | Ref.                          | Ref.                          | Ref.                           | Ref.                          | Ref.                   | Ref.                          | Ref.                          | Ref.                           | Ref.                          | Ref.                   |
| CA+AA                                         | -7.7<br>(-18.2,2.8)           | <b>-14.2*</b><br>(-22.7,-5.7) | <b>-20.3*</b><br>(-28.5,-12.0) | <b>-14.8*</b><br>(-24.4,-5.2) | -14.5<br>(-29.8,0.8)   | -10.7<br>(-21.9,0.5)          | <b>-15.7*</b><br>(-25.0,-6.3) | <b>-19.3*</b><br>(-28.4,-10.2) | <b>-12.1*</b><br>(-23.4,-0.7) | -12.0<br>(-9.6,30.2)   |
| rs7041                                        |                               |                               |                                |                               |                        |                               |                               |                                |                               |                        |
| TT                                            | Ref.                          | Ref.                          | Ref.                           | Ref.                          | Ref.                   | Ref.                          | Ref.                          | Ref.                           | Ref.                          | Ref.                   |
| TG                                            | 5.8<br>(-6.6,18.2)            | <b>14.7*</b><br>(4.1,25.3)    | <b>17.9*</b><br>(6.6,29.2)     | <b>15.0*</b><br>(2.6,27.4)    | 10.4<br>(-11.3,32.0)   | 5.4<br>(-8.0,18.8)            | <b>12.2*</b><br>(1.0,23.4)    | <b>11.9*</b><br>(1.0,22.8)     | 5.9<br>(-7.8,19.5)            | 2.4<br>(-13.8,18.7)    |
| GG                                            | 1.7<br>(-12.7,16.0)           | 8.5<br>(-3.7,20.8)            | <b>21.1*</b><br>(8.0,34.1)     | <b>16.0*</b><br>(1.7,30.4)    | 23.0<br>(-2.0,48.1)    | -5.3<br>(-21.7,11.1)          | -1.1<br>(-14.8,12.7)          | 10.6<br>(-2.7,24.0)            | 7.6<br>(-9.1,24.3)            | 10.3<br>(-9.6,30.2)    |

\*P value &lt;0.05

**Table S8.** Factors associated with VDBP levels in deficiency VitD levels.

| Variable                                       | Univariable model           |                                        |                                         |                                        |                                        | Multivariable model         |                                        |                                        |                                        |                                     |
|------------------------------------------------|-----------------------------|----------------------------------------|-----------------------------------------|----------------------------------------|----------------------------------------|-----------------------------|----------------------------------------|----------------------------------------|----------------------------------------|-------------------------------------|
|                                                | Coefficient (95% CI)        |                                        |                                         |                                        |                                        | Coefficient (95% CI)        |                                        |                                        |                                        |                                     |
|                                                | 10 <sup>th</sup>            | 25 <sup>th</sup>                       | 50 <sup>th</sup>                        | 75 <sup>th</sup>                       | 90 <sup>th</sup>                       | 10 <sup>th</sup>            | 25 <sup>th</sup>                       | 50 <sup>th</sup>                       | 75 <sup>th</sup>                       | 90 <sup>th</sup>                    |
| Age(years)                                     | <b>-0.7*</b><br>(-1.1,-0.4) | <b>-0.6*</b><br>(-0.9,-0.3)            | <b>-0.3</b><br>(-0.6,0.1)               | -0.02<br>(-0.5,0.5)                    | -0.2<br>(-0.8,0.3)                     | <b>-0.9*</b><br>(-1.5,-0.3) | <b>-0.8*</b><br>(-1.2,-0.3)            | -0.2<br>(-0.6,0.3)                     | -0.1<br>(-0.8,0.5)                     | 0.05<br>(-0.7,0.8)                  |
| Sex                                            |                             |                                        |                                         |                                        |                                        |                             |                                        |                                        |                                        |                                     |
| Men                                            | Ref.                        | Ref.                                   | Ref.                                    | Ref.                                   | Ref.                                   | Ref.                        | Ref.                                   | Ref.                                   | Ref.                                   | Ref.                                |
| Women                                          | -1.6<br>(-15.6,12.4)        | 2.1<br>(-10.4,14.5)                    | 10.6<br>(-1.4,22.5)                     | 9.5<br>(-7.4,26.3)                     | 19.0<br>(-4.9,42.9)                    | 8.0<br>(-11.8,27.8)         | 1.2<br>(-13.9,16.3)                    | 12.8<br>(-2.6,28.3)                    | 16.2<br>(-5.9,38.3)                    | <b>28.3*</b><br>( <b>3.0,53.7</b> ) |
| Menopause                                      | -7.8<br>(-21.4,5.8)         | -6.7<br>(-17.7,4.3)                    | -0.6<br>(-11.5,10.3)                    | -5.9<br>(-20.9,9.1)                    | -13.8<br>(-31.1,3.4)                   | -1.2<br>(-23.3,21.0)        | 8.9<br>(-7.9,25.8)                     | -6.0<br>(-23.3,11.3)                   | -12.9<br>(-37.6,11.9)                  | -14.1<br>(-42.5,14.3)               |
| Leisure time physical activity                 |                             |                                        |                                         |                                        |                                        |                             |                                        |                                        |                                        |                                     |
| Inactive (<30 min/day)                         | Ref.                        | Ref.                                   | Ref.                                    | Ref.                                   | Ref.                                   | Ref.                        | Ref.                                   | Ref.                                   | Ref.                                   | Ref.                                |
| Active (≥30 min/day)                           | 1.8<br>(-11.8,15.5)         | -3.4<br>(-15.6,8.8)                    | -0.9<br>(-12.4,10.6)                    | 0.4<br>(-16.4,17.2)                    | -10.2<br>(-31.5,11.0)                  | 1.7<br>(-14.2,17.5)         | -0.9<br>(-12.9,11.2)                   | -4.0<br>(-16.4,8.4)                    | -0.5<br>(-18.2,17.2)                   | -0.6<br>(-20.9,19.8)                |
| Smoking status                                 |                             |                                        |                                         |                                        |                                        |                             |                                        |                                        |                                        |                                     |
| Normal                                         | Ref.                        | Ref.                                   | Ref.                                    | Ref.                                   | Ref.                                   | Ref.                        | Ref.                                   | Ref.                                   | Ref.                                   | Ref.                                |
| Current                                        | -3.7<br>(-24.9,17.6)        | -4.5<br>(-22.8,13.7)                   | -13.8<br>(-31.3,3.8)                    | -2.4<br>(-27.6,22.8)                   | -16.2<br>(-50.4,18.0)                  | -9.5<br>(-33.9,15.0)        | -9.4<br>(-28.0,9.2)                    | -11.8<br>(-30.9,7.3)                   | -1.1<br>(-22.4,20.1)                   | -7.2<br>(-38.5,24.2)                |
| Past                                           | -5.7<br>(-20.8,9.3)         | -2.0<br>(-15.0,10.9)                   | 4.1<br>(-8.4,16.5)                      | 10.5<br>(-7.3,28.4)                    | 1.1<br>(-23.1,25.4)                    | -3.6<br>(-20.8,13.5)        | 0.5<br>(-12.6,13.6)                    | 5.5<br>(-7.8,19.0)                     | -1.8<br>(-20.8,17.2)                   | 20.0<br>(-2.0,42.1)                 |
| BMI (kg/m <sup>2</sup> )                       |                             |                                        |                                         |                                        |                                        |                             |                                        |                                        |                                        |                                     |
| Normal                                         | Ref.                        | Ref.                                   | Ref.                                    | Ref.                                   | Ref.                                   | Ref.                        | Ref.                                   | Ref.                                   | Ref.                                   | Ref.                                |
| Overweight                                     | -1.1<br>(-17.0,14.7)        | -11.0<br>(-24.9,2.8)                   | -4.7<br>(-18.5,9.0)                     | -9.9<br>(-28.5,8.7)                    | -5.4<br>(-34.7,23.9)                   | -5.8<br>(-22.9,11.2)        | -6.2<br>(-19.2,6.8)                    | -0.5<br>(-13.8,12.8)                   | -1.7<br>(-4.4,1.0)                     | -9.6<br>(-31.4,12.2)                |
| Obesity                                        | 1.2<br>(-16.5,19.0)         | -11.9<br>(-24.3,0.5)                   | -3.8<br>(-16.0,8.5)                     | 0.3<br>(-16.3,16.9)                    | -9.6<br>(-35.8,16.6)                   | -13.0<br>(-32.0,6.0)        | -12.1<br>(-26.6,2.4)                   | -8.6<br>(-23.4,6.3)                    | -1.1<br>(-22.4,20.1)                   | -4.4<br>(-28.8,20.0)                |
| Total 25-hydroxivitamin D (ng/mL) <sup>a</sup> | 1.1<br>(-1.0,3.3)           | 0.01<br>(-1.8,1.8)                     | -1.8<br>(-3.6,-0.05)                    | -1.8<br>(-4.3,0.8)                     | -2.8<br>(-6.0,0.4)                     | 0.7<br>(-1.7,3.1)           | -0.003<br>(-1.8,1.8)                   | -1.8<br>(-3.6,0.1)                     | -1.7<br>(-4.4,1.0)                     | -2.0<br>(-5.1,1.0)                  |
| Vitamin D intake (UI/day) <sup>a</sup>         | -0.04<br>(-0.09,0.0001)     | -0.02<br>(-0.05,0.02)                  | -0.02<br>(-0.05,0.02)                   | -0.02<br>(-0.07,0.03)                  | -0.003<br>(-0.08,0.07)                 | -0.002<br>(-0.05,0.05)      | -0.005<br>(-0.04,0.03)                 | -0.02<br>(-0.06,0.02)                  | -0.04<br>(-0.1,0.01)                   | 0.03<br>(-0.04,0.09)                |
| Alcohol(g/day) <sup>a</sup>                    | 0.2<br>(-0.4,0.9)           | 0.09<br>(-0.5,0.7)                     | <b>0.7*</b><br>( <b>0.2,1.3</b> )       | 0.4<br>(-0.4,1.2)                      | 0.2<br>(-0.9,1.2)                      | 0.4<br>(-0.4,1.2)           | 0.4<br>(-0.2,1.0)                      | <b>0.7*</b><br>( <b>0.1,1.3</b> )      | 0.4<br>(-0.4,1.3)                      | 0.2<br>(-0.8,1.2)                   |
| rs4588                                         |                             |                                        |                                         |                                        |                                        |                             |                                        |                                        |                                        |                                     |
| CC                                             | Ref.                        | Ref.                                   | Ref.                                    | Ref.                                   | Ref.                                   | Ref.                        | Ref.                                   | Ref.                                   | Ref.                                   | Ref.                                |
| CA+AA                                          | -9.1<br>(-21.6,3.4)         | <b>-16.9*</b><br>( <b>-26.5,-7.2</b> ) | <b>-20.4*</b><br>( <b>-30.1,-10.7</b> ) | <b>-21.0*</b><br>( <b>-32.5,-9.5</b> ) | <b>-20.1*</b><br>( <b>-36.5,-3.6</b> ) | -10.0<br>(-24.2,4.2)        | <b>-15.1*</b><br>( <b>-25.9,-4.3</b> ) | <b>-15.3*</b><br>( <b>-26.4,-4.2</b> ) | <b>-16.8*</b><br>( <b>-32.6,-1.0</b> ) | -11.7<br>(-29.9,6.5)                |
| rs7041                                         |                             |                                        |                                         |                                        |                                        |                             |                                        |                                        |                                        |                                     |
| TT                                             | Ref.                        | Ref.                                   | Ref.                                    | Ref.                                   | Ref.                                   | Ref.                        | Ref.                                   | Ref.                                   | Ref.                                   | Ref.                                |
| TG                                             | 2.6<br>(-16.7,11.5)         | 3.1<br>(-10.4,16.6)                    | <b>12.2*</b><br>( <b>0.1,24.2</b> )     | <b>18.6*</b><br>( <b>1.3,36.0</b> )    | <b>23.3*</b><br>( <b>3.5,43.2</b> )    | -6.8<br>(-23.8,10.2)        | -0.008<br>(-12.9,12.9)                 | 4.4<br>(-8.9,17.6)                     | 8.5<br>(-10.4,27.5)                    | 15.8<br>(-6.0,37.6)                 |
| GG                                             | 8.4<br>(-9.1,25.9)          | 15.1<br>(-1.6,31.9)                    | <b>24.4*</b><br>( <b>9.4,39.4</b> )     | <b>28.9*</b><br>( <b>7.4,50.5</b> )    | <b>47.8*</b><br>( <b>23.1,72.5</b> )   | -5.6<br>(-28.8,17.6)        | 6.7<br>(-11.0,24.4)                    | 10.3<br>(-7.9,28.4)                    | 17.4<br>(-8.4,43.3)                    | <b>39.3*</b><br>( <b>9.6,69.5</b> ) |



---

\*P value <0.05

**Table S9.** Associations between *GC* gene variants and hip BMD in all participants.

|           | n     | Categorical hip BMD        |                |                               |                | Continuous hip BMD              |                |                                    |                |
|-----------|-------|----------------------------|----------------|-------------------------------|----------------|---------------------------------|----------------|------------------------------------|----------------|
|           |       | Crude model<br>OR (95% CI) | <i>P</i> value | Adjusted model<br>OR (95% CI) | <i>P</i> value | Crude model<br>$\beta$ (95% CI) | <i>P</i> value | Adjusted model<br>$\beta$ (95% CI) | <i>P</i> value |
| rs4588    |       |                            |                |                               |                |                                 |                |                                    |                |
| CC        | 1,122 | Ref.                       |                | Ref.                          |                | Ref.                            |                | Ref.                               |                |
| CA+AA     | 699   | 1.16(0.93,1.44)            | 0.178          | 1.14(0.88,1.46)               | 0.326          | -0.02(-0.03,-0.001)             | 0.036          | -0.01(-0.02,0.002)                 | 0.138          |
| rs7041    |       |                            |                |                               |                |                                 |                |                                    |                |
| TT        | 499   | Ref.                       |                | Ref.                          |                | Ref.                            |                | Ref.                               |                |
| TG        | 904   | 0.88(0.67,1.13)            | 0.321          | 0.87(0.65,1.16)               | 0.354          | 0.005(-0.01,0.02)               | 0.529          | -0.0001(-0.01,0.01)                | 0.991          |
| GG        | 419   | 0.79(0.58,1.07)            | 0.123          | 0.75(0.53,1.07)               | 0.113          | 0.01(-0.009,0.03)               | 0.273          | 0.01(-0.01,0.03)                   | 0.196          |
| Haplotype |       |                            |                |                               |                |                                 |                |                                    |                |
| 1S/1S     | 404   | Ref.                       |                | Ref.                          |                | Ref.                            |                | Ref.                               |                |
| 1F/1S     | 537   | 1.05(0.77,1.42)            | 0.770          | 1.05(0.74,1.49)               | 0.796          | 0.0005(-0.02,0.02)              | 0.962          | -0.005(-0.02,0.01)                 | 0.529          |
| 1F/1F     | 181   | 1.04(0.69,1.58)            | 0.845          | 1.17(0.73,1.87)               | 0.521          | -0.01(-0.04,0.02)               | 0.407          | -0.02(-0.04,0.004)                 | 0.119          |
| 1S/2      | 365   | 1.13(0.81,1.57)            | 0.479          | 1.17(0.80,1.71)               | 0.429          | -0.019(-0.04,0.002)             | 0.081          | <b>-0.02(-0.04,-0.002)</b>         | <b>0.025</b>   |
| 1F/2      | 267   | 1.14(0.80,1.64)            | 0.467          | 1.14(0.75,4.82)               | 0.534          | -0.008(-0.03,0.02)              | 0.503          | -0.006(-0.03,0.01)                 | 0.505          |
| 2/2       | 51    | <b>2.75(1.51,5.00)</b>     | <b>0.001</b>   | <b>2.40(1.19,4.80)</b>        | <b>0.014</b>   | -0.04(-0.09,0.002)              | 0.059          | -0.01(-0.05,0.02)                  | 0.474          |

Model adjusted for age groups, sex, BMI (normal, overweight, obesity), alcohol (g/day), leisure time physical activity (active  $\geq 150$  min/week), smoking (never, current, past), vitamin D intake. Traditional nomenclature referring to the protein phenotypes: (a) GC1F (rs7041-T/rs4588-C); (b) GC1S (rs7041-G/rs4588-C) and (c) GC2 (rs7041-T/rs4588-A).

**Table S10.** Associations between *GC* gene variants and hip BMD by sex.

| All women           |             |                                   |              |                                   |                |                                      |              |                                      |              | All men             |         |                     |         |                        |         |                        |         |
|---------------------|-------------|-----------------------------------|--------------|-----------------------------------|----------------|--------------------------------------|--------------|--------------------------------------|--------------|---------------------|---------|---------------------|---------|------------------------|---------|------------------------|---------|
| Categorical hip BMD |             |                                   |              |                                   |                |                                      |              |                                      |              | Continuous hip BMD  |         |                     |         |                        |         |                        |         |
| Crude model         |             |                                   |              |                                   | Adjusted model |                                      |              |                                      |              | Crude model         |         |                     |         | Adjusted model         |         |                        |         |
| n                   | OR (95% CI) | P value                           | OR (95% CI)  | P value                           | β (95% CI)     | P value                              | β (95% CI)   | P value                              | n            | OR (95% CI)         | P value | OR (95% CI)         | P value | β (95% CI)             | P value | β (95% CI)             | P value |
| rs4588              |             |                                   |              |                                   |                |                                      |              |                                      |              |                     |         |                     |         |                        |         |                        |         |
| CC                  | 773         | Ref.                              |              | Ref.                              |                | Ref.                                 |              |                                      | 349          | Ref.                |         | Ref.                |         | Ref.                   |         | Ref.                   |         |
| CA+AA               | 495         | 1.10<br>(0.9,1.4)                 | 0.426        | 1.08<br>(0.80,1.45)               | 0.629          | -0.02<br>(-0.03,0.0001)              | 0.051        | -0.009<br>(-0.02,0.004)              | 0.183        | 1.30<br>(0.83,2.04) | 0.248   | 1.31<br>(0.79,2.17) | 0.295   | -0.01<br>(-0.03,0.02)  | 0.601   | -0.01<br>(-0.03,0.02)  | 0.531   |
| rs7041              |             |                                   |              |                                   |                |                                      |              |                                      |              |                     |         |                     |         |                        |         |                        |         |
| TT                  | 355         | Ref.                              |              | Ref.                              |                | Ref.                                 |              |                                      | 144          | Ref.                |         | Ref.                |         | Ref.                   |         | Ref.                   |         |
| TG                  | 615         | 0.84<br>(0.63,1.12)               | 0.283        | 0.81<br>(0.58,1.14)               | 0.226          | 0.01<br>(-0.006,0.03)                | 0.186        | 0.01<br>(-0.01,0.03)                 | 0.192        | 1.13<br>(0.65,1.96) | 0.657   | 1.32<br>(0.72,2.43) | 0.367   | -0.02<br>(-0.05,0.005) | 0.099   | -0.03<br>(-0.05,-0.01) | 0.039   |
| GG                  | 299         | <b>0.66</b><br><b>(0.47,0.94)</b> | <b>0.021</b> | <b>0.62</b><br><b>(0.41,0.94)</b> | <b>0.025</b>   | <b>0.03</b><br><b>(0.005,0.05)</b>   | <b>0.018</b> | <b>0.02</b><br><b>(0.003,0.04)</b>   | <b>0.021</b> | 1.39<br>(0.73,2.62) | 0.315   | 1.40<br>(0.69,2.83) | 0.346   | -0.03<br>(-0.06,0.008) | 0.128   | -0.02<br>(-0.05,0.01)  | 0.223   |
| Haplotype           |             |                                   |              |                                   |                |                                      |              |                                      |              |                     |         |                     |         |                        |         |                        |         |
| 1S/1S               | 286         | Ref.                              |              | Ref.                              |                | Ref.                                 |              |                                      | 118          | Ref.                |         | Ref.                |         | Ref.                   |         | Ref.                   |         |
| 1F/1S               | 353         | 1.26<br>(0.88,1.80)               | 0.202        | 1.23<br>(0.81,1.88)               | 0.333          | -0.01<br>(-0.03,0.01)                | 0.285        | -0.01<br>(-0.03,0.01)                | 0.443        | 0.67<br>(0.37,1.24) | 0.201   | 0.76<br>(0.39,1.51) | 0.439   | 0.01<br>(-0.02,0.05)   | 0.468   | 0.001<br>(-0.03,0.03)  | 0.933   |
| 1F/1F               | 134         | 1.29<br>(0.81,2.05)               | 0.277        | 1.47<br>(0.85,2.52)               | 0.167          | -0.03<br>(-0.05,0.005)               | 0.099        | <b>-0.03</b><br><b>(-0.05,-0.01)</b> | <b>0.015</b> | 0.36<br>(0.12,1.11) | 0.077   | 0.40<br>(0.12,1.31) | 0.129   | 0.04<br>(-0.01,0.09)   | 0.123   | 0.02<br>(-0.02,0.07)   | 0.298   |
| 1S/2                | 260         | 1.16<br>(0.79,1.70)               | 0.454        | 1.17<br>(0.74,1.86)               | 0.493          | -0.02<br>(-0.05,0.003)               | 0.079        | -0.02<br>(-0.04,0.002)               | 0.073        | 1.04<br>(0.54,1.99) | 0.910   | 1.28<br>(0.61,2.68) | 0.509   | -0.01<br>(-0.05,0.03)  | 0.540   | -0.02<br>(-0.06,0.01)  | 0.172   |
| 1F/2                | 185         | 1.33<br>(0.88,2.02)               | 0.178        | 1.37<br>(0.84,2.24)               | 0.207          | -0.03<br>(-0.05,0.001)               | 0.060        | -0.02<br>(-0.04,0.004)               | 0.108        | 0.74<br>(0.35,1.55) | 0.423   | 0.67<br>(0.29,1.52) | 0.335   | 0.03<br>(-0.01,0.07)   | 0.184   | 0.02<br>(-0.01,0.06)   | 0.235   |
| 2/2                 | 36          | <b>3.14</b><br><b>(1.55,6.38)</b> | <b>0.001</b> | <b>2.35</b><br><b>(1.01,5.46)</b> | <b>0.047</b>   | <b>-0.06</b><br><b>(-0.11,-0.01)</b> | <b>0.020</b> | -0.01<br>(-0.05,0.03)                | 0.515        | 1.96<br>(0.61,6.27) | 0.257   | 2.31<br>(0.63,8.40) | 0.205   | -0.004<br>(-0.08,0.07) | 0.909   | -0.005<br>(-0.07,0.07) | 0.895   |

Model adjusted for age groups, BMI (normal, overweight, obesity), alcohol (g/day), leisure time physical activity (active  $\geq 150$  min/week), smoking (never, current, past), vitamin D intake. Traditional nomenclature referring to the protein phenotypes: (a) GC1F (rs7041-T/rs4588-C); (b) GC1S (rs7041-G/rs4588-C) and (c) GC2 (rs7041-T/rs4588-A).

**Table S11.** Associations between GC gene variants and low hip BMD by status menopausal.

| Premenopausal women |     |                                    |              |                                   |                    |                                        |              |                                       |              | Postmenopausal women |                     |            |                                    |                    |                        |            |                        |            |
|---------------------|-----|------------------------------------|--------------|-----------------------------------|--------------------|----------------------------------------|--------------|---------------------------------------|--------------|----------------------|---------------------|------------|------------------------------------|--------------------|------------------------|------------|------------------------|------------|
| Categorical hip BMD |     |                                    |              |                                   | Continuous hip BMD |                                        |              |                                       |              | Categorical hip BMD  |                     |            |                                    | Continuous hip BMD |                        |            |                        |            |
|                     | n   | Crude model                        |              | Adjusted model                    |                    | Crude model                            |              | Adjusted model                        |              |                      | Crude model         |            | Adjusted model                     |                    | Crude model            |            | Adjusted model         |            |
|                     |     | OR<br>(95% CI)                     | P<br>value   | OR<br>(95% CI)                    | P<br>value         | β<br>(95% CI)                          | P<br>value   | β<br>(95% CI)                         | P<br>value   | n                    | OR<br>(95% CI)      | P<br>value | OR<br>(95% CI)                     | P<br>value         | β<br>(95% CI)          | P<br>value | β<br>(95% CI)          | P<br>value |
| rs4588              |     |                                    |              |                                   |                    |                                        |              |                                       |              |                      |                     |            |                                    |                    |                        |            |                        |            |
| CC                  | 305 | Ref.                               |              | Ref.                              |                    | Ref.                                   |              | Ref.                                  |              | 468                  | Ref.                |            | Ref.                               |                    | Ref.                   |            | Ref.                   |            |
| CA+AA               | 200 | 1.62<br>(0.97,2.73)                | 0.066        | 1.44<br>(0.80,2.62)               | 0.228              | -0.03<br>(-0.05,-0.004)                | 0.022        | -0.02<br>(-0.04,0.01)                 | 0.149        | 295                  | 1.00<br>(0.74,1.35) | 0.996      | 1.03<br>(0.73,1.47)                | 0.859              | -0.007<br>(-0.03,0.01) | 0.489      | -0.005<br>(-0.02,0.01) | 0.596      |
| rs7041              |     |                                    |              |                                   |                    |                                        |              |                                       |              |                      |                     |            |                                    |                    |                        |            |                        |            |
| TT                  | 139 | Ref.                               |              | Ref.                              |                    | Ref.                                   |              | Ref.                                  |              | 216                  | Ref.                |            | Ref.                               |                    | Ref.                   |            | Ref.                   |            |
| TG                  | 260 | 0.62<br>(0.35,1.09)                | 0.099        | 0.56<br>(0.29,1.07)               | 0.086              | 0.02<br>(-0.01,0.05)                   | 0.142        | 0.02<br>(-0.007,0.04)                 | 0.176        | 355                  | 0.98<br>(0.69,1.38) | 0.895      | 0.87<br>(0.62,1.21)                | 0.410              | 0.001<br>(-0.02,0.02)  | 0.935      | 0.005<br>(-0.02,0.02)  | 0.639      |
| GG                  | 106 | 0.48<br>(0.22,1.04)                | 0.062        | 0.51<br>(0.51,1.18)               | 0.116              | <b>0.04</b><br><b>(0.01,0.07)</b>      | <b>0.008</b> | <b>0.03</b><br><b>(-0.01,0.06)</b>    | <b>0.017</b> | 193                  | 0.66<br>(0.44,1.01) | 0.054      | <b>0.65</b><br><b>(0.43,0.98)</b>  | <b>0.040</b>       | 0.02<br>(-0.006,0.05)  | 0.128      | 0.01<br>(-0.009,0.04)  | 0.246      |
| Haplotype           |     |                                    |              |                                   |                    |                                        |              |                                       |              |                      |                     |            |                                    |                    |                        |            |                        |            |
| 1S/1S               | 104 | Ref.                               |              | Ref.                              |                    | Ref.                                   |              | Ref.                                  |              | 182                  | Ref.                |            | Ref.                               |                    | Ref.                   |            | Ref.                   |            |
| 1F/1S               | 148 | 1.06<br>(0.46,2.46)                | 0.892        | 0.87<br>(0.35,2.19)               | 0.775              | -0.01<br>(-0.05,0.02)                  | 0.390        | -0.01<br>(-0.04,0.02)                 | 0.394        | 205                  | 1.51<br>(0.99,2.28) | 0.054      | 0.91<br>(0.37,2.25)                | 0.866              | -0.02<br>(-0.05,0.01)  | 0.117      | -0.01<br>(-0.03,0.02)  | 0.580      |
| 1F/1F               | 53  | 1.67<br>(0.62,4.52)                | 0.312        | 2.03<br>(0.69,5.93)               | 0.197              | <b>-0.05</b><br><b>(-0.08,-0.003)</b>  | <b>0.037</b> | <b>-0.04</b><br><b>(-0.08,-0.006)</b> | <b>0.021</b> | 81                   | 1.29<br>(0.75,2.23) | 0.356      | 1.75<br>(0.61,5.03)                | 0.233              | -0.02<br>(-0.06,0.02)  | 0.304      | -0.02<br>(-0.05,0.01)  | 0.194      |
| 1S/2                | 112 | 1.57<br>(0.68,3.63)                | 0.295        | 1.33<br>(0.54,3.30)               | 0.537              | <b>-0.04</b><br><b>(-0.07,-0.005)</b>  | <b>0.025</b> | -0.03<br>(-0.06,0.002)                | 0.071        | 148                  | 1.20<br>(0.76,1.89) | 0.439      | 1.54<br>(0.64,3.72)                | 0.325              | -0.02<br>(-0.05,0.01)  | 0.196      | -0.01<br>(-0.04,0.01)  | 0.332      |
| 1F/2                | 74  | 1.64<br>(0.66,4.09)                | 0.288        | 1.34<br>(0.49,3.68)               | 0.570              | <b>-0.04</b><br><b>(-0.08,-0.0001)</b> | <b>0.049</b> | -0.03<br>(-0.06,0.006)                | 0.106        | 111                  | 1.37<br>(0.84,2.24) | 0.210      | 1.54<br>(0.57,4.14)                | 0.475              | -0.02<br>(-0.05,0.01)  | 0.232      | -0.01<br>(-0.04,0.01)  | 0.367      |
| 2/2                 | 12  | <b>9.40</b><br><b>(2.54,34.70)</b> | <b>0.001</b> | <b>6.88</b><br><b>(1.51,31.4)</b> | <b>0.013</b>       | <b>-0.08</b><br><b>(-0.16,-0.004)</b>  | <b>0.040</b> | -0.04<br>(-0.10,0.03)                 | 0.310        | 24                   | 2.08<br>(0.88,4.92) | 0.093      | <b>8.46</b><br><b>(1.97,36.30)</b> | <b>0.004</b>       | -0.04<br>(-0.10,0.02)  | 0.211      | 0.0004<br>(-0.05,0.05) | 0.986      |

Model adjusted for age groups, BMI (normal, overweight, obesity), alcohol (g/day), leisure time physical activity (active  $\geq 150$  min/week), smoking (never, current, past), vitamin D intake. Traditional nomenclature referring to the protein phenotypes: (a) GC1F (rs7041-T/rs4588-C); (b) GC1S (rs7041-G/rs4588-C) and (c) GC2 (rs7041-T/rs4588-A).

**Table S12.** Spearman correlation between VDBP levels, different forms of 25(OH)D and BMD by menopausal status.

|                                                       | Premenopausal Women       |         |                                |         |                                |         | Postmenopausal women      |         |                                |         |                                |         |
|-------------------------------------------------------|---------------------------|---------|--------------------------------|---------|--------------------------------|---------|---------------------------|---------|--------------------------------|---------|--------------------------------|---------|
|                                                       | Hip BMD g/cm <sup>2</sup> |         | Femoral neck g/cm <sup>2</sup> |         | Lumbar spine g/cm <sup>2</sup> |         | Hip BMD g/cm <sup>2</sup> |         | Femoral neck g/cm <sup>2</sup> |         | Lumbar spine g/cm <sup>2</sup> |         |
|                                                       | r                         | P value | r                              | P value | r                              | P value | r                         | P value | r                              | P value | r                              | P value |
| VDBP levels (μmol/l)                                  | -0.046                    | 0.300   | -0.003                         | 0.944   | -0.043                         | 0.333   | 0.158                     | <0.001  | 0.140                          | <0.001  | 0.026                          | 0.470   |
| Total 25-hydroxivitamin D (ng/mL)                     | -0.026                    | 0.264   | -0.031                         | 0.483   | 0.042                          | 0.346   | 0.083                     | 0.021   | 0.119                          | 0.0009  | 0.080                          | 0.025   |
| Free 25-hydroxivitamin D (pg/mL) <sup>a</sup>         | -0.007                    | 0.874   | -0.012                         | 0.777   | 0.053                          | 0.211   | -0.007                    | 0.861   | 0.025                          | 0.506   | 0.044                          | 0.240   |
| Bioavailable 25-hydroxivitamin D (ng/mL) <sup>a</sup> | -0.016                    | 0.712   | -0.007                         | 0.871   | 0.060                          | 0.158   | 0.009                     | 0.811   | 0.047                          | 0.203   | 0.060                          | 0.107   |
| Free 25-hydroxivitamin D-SNP adjusted (pg/mL)         | 0.029                     | 0.513   | 0.036                          | 0.427   | 0.057                          | 0.203   | -0.003                    | 0.942   | 0.010                          | 0.795   | 0.027                          | 0.464   |
| Bioavailable 25-hydroxivitamin D-SNP adjusted (ng/mL) | 0.002                     | 0.701   | 0.035                          | 0.431   | 0.059                          | 0.186   | 0.008                     | 0.838   | 0.025                          | 0.423   | 0.039                          | 0.286   |

**Table S13.** Spearman correlation between VDBP levels, different forms of 25(OH)D and BMD by sex.

|                                                       | All Women                 |         |                                |         |                                |         | All men                   |         |                                |         |                                |         |
|-------------------------------------------------------|---------------------------|---------|--------------------------------|---------|--------------------------------|---------|---------------------------|---------|--------------------------------|---------|--------------------------------|---------|
|                                                       | Hip BMD g/cm <sup>2</sup> |         | Femoral neck g/cm <sup>2</sup> |         | Lumbar spine g/cm <sup>2</sup> |         | Hip BMD g/cm <sup>2</sup> |         | Femoral neck g/cm <sup>2</sup> |         | Lumbar spine g/cm <sup>2</sup> |         |
|                                                       | r                         | P value | r                              | P value | r                              | P value | r                         | P value | r                              | P value | r                              | P value |
| VDBP levels (μmol/l)                                  | 0.089                     | 0.002   | 0.096                          | 0.005   | 0.032                          | 0.248   | -0.057                    | 0.179   | -0.074                         | 0.079   | -0.061                         | 0.151   |
| Total 25-hydroxivitamin D (ng/mL)                     | 0.015                     | 0.588   | 0.039                          | 0.161   | 0.040                          | 0.153   | 0.047                     | 0.269   | 0.059                          | 0.159   | 0.053                          | 0.208   |
| Free 25-hydroxivitamin D (pg/mL) <sup>a</sup>         | -0.021                    | 0.451   | -0.011                         | 0.701   | 0.016                          | 0.573   | -0.078                    | 0.064   | -0.100                         | 0.019   | -0.088                         | 0.036   |
| Bioavailable 25-hydroxivitamin D (ng/mL) <sup>a</sup> | -0.003                    | 0.909   | -0.021                         | 0.450   | 0.020                          | 0.468   | -0.063                    | 0.136   | -0.055                         | 0.191   | -0.095                         | 0.024   |
| Free 25-hydroxivitamin D-SNP adjusted (pg/mL)         | -0.007                    | 0.814   | -0.001                         | 0.964   | 0.009                          | 0.752   | -0.033                    | 0.445   | -0.054                         | 0.206   | -0.069                         | 0.104   |
| Bioavailable 25-hydroxivitamin D-SNP adjusted (ng/mL) | -0.007                    | 0.811   | 0.005                          | 0.851   | 0.015                          | 0.605   | -0.017                    | 0.684   | -0.027                         | 0.535   | -0.078                         | 0.067   |

**Table S14.** Descriptive statistics by sex and BMD status.

| Characteristics                                                    | Premenopausal women     |                        |                | Postmenopausal women    |                        |                | Men                     |                        |                |
|--------------------------------------------------------------------|-------------------------|------------------------|----------------|-------------------------|------------------------|----------------|-------------------------|------------------------|----------------|
|                                                                    | Normal hip BMD          | Low hip BMD            | <i>P</i> value | Normal hip BMD          | Low hip BMD            | <i>P</i> value | Normal hip BMD          | Low hip BMD            | <i>P</i> value |
|                                                                    | n=444                   | n=69                   |                | n=484                   | n=292                  |                | n=463                   | n=100                  |                |
| Total 25-hydroxivitamin D (ng/mL) <sup>a</sup>                     | 20.4<br>(19.7-21.1)     | 19.6<br>(17.9-21.2)    | 0.103          | 21.4<br>(20.8-22.0)     | 20.5<br>(19.7-21.0)    | 0.982          | 22.1<br>(20.6-23.6)     | 22.1<br>(20.6-23.6)    | 0.205          |
| Vitamin D-binding protein (μmol/l) <sup>a</sup>                    | 278.5<br>(271-285.6)    | 285.3<br>(267.7-303.0) | 0.601          | 282.4<br>(274.3-289.6)  | 258.1<br>(249.0-267.1) | 0.009          | 264.5<br>(258.1-270.9)  | 263.8<br>(250.0-277.7) | 0.757          |
| Free 25-hydroxivitamin D (pg/mL) <sup>a</sup>                      | 5.6<br>(5.4-5.8)        | 5.2<br>(4.6-5.8)       | 0.062          | 5.8<br>(5.6-6.1)        | 5.8<br>(5.5-6.1)       | 0.743          | 6.3<br>(6.1-6.6)        | 6.1<br>(5.5-6.6)       | 0.107          |
| Bioavailable 25-hydroxivitamin D (ng/mL) <sup>a</sup>              | 2.1<br>(2.0-2.2)        | 2.0<br>(1.7-2.2)       | 0.066          | 2.2<br>(2.1-2.3)        | 2.2<br>(2.1-2.3)       | 0.825          | 2.4<br>(2.3-2.5)        | 2.3<br>(2.1-2.5)       | 0.060          |
| Free 25-hydroxivitamin D-SNP adjusted (pg/mL) <sup>a</sup>         | 6.4<br>(6.0-6.7)        | 5.7<br>(4.8-6.5)       | 0.159          | 6.5<br>(6.2-6.8)        | 6.7<br>(6.3-7.2)       | 0.144          | 7.3<br>(6.9-7.6)        | 6.7<br>(6.0-7.5)       | 0.052          |
| Bioavailable 25-hydroxivitamin D-SNP adjusted (ng/mL) <sup>a</sup> | 2.4<br>(2.2-2.5)        | 2.1<br>(1.7-2.4)       | 0.121          | 2.5<br>(2.4-2.6)        | 2.5<br>(2.3-2.6)       | 0.690          | 2.8<br>(2.7-2.9)        | 2.6<br>(2.3-2.9)       | 0.037          |
|                                                                    |                         |                        |                |                         |                        |                |                         |                        |                |
| Characteristics                                                    | Normal femoral neck BMD | Low femoral neck BMD   | <i>P</i> value | Normal femoral neck BMD | Low femoral neck BMD   | <i>P</i> value | Normal femoral neck BMD | Low femoral neck BMD   | <i>P</i> value |
|                                                                    | n=411                   | n=102                  |                | n=331                   | n=442                  |                | n=408                   | n=151                  |                |
|                                                                    |                         |                        |                |                         |                        |                |                         |                        |                |
| Total 25-hydroxivitamin D (ng/mL) <sup>a</sup>                     | 20.4<br>(19.7-21.0)     | 19.6<br>(18.4-21.0)    | 0.025          | 21.8<br>(21.1-22.5)     | 20.6<br>(20.0-21.2)    | 0.718          | 21.9<br>(21.2-22.7)     | 22.5<br>(21.4-23.7)    | 0.578          |
| Vitamin D-binding protein (μmol/l) <sup>a</sup>                    | 278.2<br>(271.0-285.4)  | 283.7<br>(269.9-297.5) | 0.528          | 283.6<br>(275.1-292.1)  | 265.2<br>(258.0-272.4) | 0.075          | 265.2<br>(258.1-272.3)  | 262.8<br>(251.1-274.4) | 0.852          |
| Free 25-hydroxivitamin D (pg/mL) <sup>a</sup>                      | 5.6<br>(5.3-5.8)        | 5.3<br>(4.8-5.8)       | 0.133          | 5.9<br>(5.7-6.2)        | 5.8<br>(5.5-6.0)       | 0.877          | 6.3<br>(6.0-6.6)        | 6.4<br>(5.9-6.8)       | 0.371          |
| Bioavailable 25-hydroxivitamin D (ng/mL) <sup>a</sup>              | 2.1<br>(1.0-2.2)        | 2.0<br>(1.8-2.2)       | 0.154          | 2.2<br>(2.1-2.3)        | 2.2<br>(2.1-2.3)       | 0.967          | 2.4<br>(2.3-2.5)        | 2.4<br>(2.2-2.6)       | 0.571          |
| Free 25-hydroxivitamin D-SNP adjusted (pg/mL) <sup>a</sup>         | 6.4<br>(6.0-6.7)        | 5.7<br>(4.9-6.4)       | 0.143          | 6.6<br>(6.2-7.0)        | 6.5<br>(6.2-6.9)       | 0.975          | 7.3<br>(6.9-7.6)        | 7.2<br>(6.7-7.8)       | 0.273          |
| Bioavailable 25-hydroxivitamin D-SNP adjusted (ng/mL) <sup>a</sup> | 2.4<br>(2.2-2.5)        | 2.1<br>(1.9-2.4)       | 0.181          | 2.6<br>(2.4-2.7)        | 2.4<br>(2.3-2.6)       | 0.587          | 2.8<br>(2.6-2.9)        | 2.8<br>(2.6-3.0)       | 0.768          |
|                                                                    |                         |                        |                |                         |                        |                |                         |                        |                |
| Characteristics                                                    | Normal lumbar spine BMD | Low lumbar spine BMD   | <i>P</i> value | Normal lumbar spine BMD | Low lumbar spine BMD   | <i>P</i> value | Normal lumbar spine BMD | Low lumbar spine BMD   | <i>P</i> value |
|                                                                    | n=373                   | n=140                  |                | n=227                   | n=546                  |                | n=318                   | n=245                  |                |
|                                                                    |                         |                        |                |                         |                        |                |                         |                        |                |
| Total 25-hydroxivitamin D (ng/mL) <sup>a</sup>                     | 20.8<br>(20.0-21.6)     | 19.5<br>(18.3-20.8)    | 0.037          | 21.3<br>(20.5-22.2)     | 21.0<br>(20.5-21.6)    | 0.786          | 21.3<br>(20.5-22.2)     | 22.6<br>(21.7-23.6)    | 0.157          |
| Vitamin D-binding protein (μmol/l) <sup>a</sup>                    | 278.6<br>(270.9-286.3)  | 281.3<br>(269.0-293.6) | 0.615          | 272.8<br>(261.8-283.8)  | 271.7<br>(264.9-278.6) | 0.625          | 267.0<br>(259.4-274.6)  | 260.5<br>(251.8-269.2) | 0.142          |
| Free 25-hydroxivitamin D (pg/mL) <sup>a</sup>                      | 5.6<br>(5.3-5.9)        | 5.3<br>(4.9-5.7)       | 0.145          | 5.9<br>(5.6-6.2)        | 5.8<br>(5.6-6.0)       | 0.780          | 5.9<br>(5.6-6.2)        | 6.5<br>(6.2-6.9)       | 0.021          |
| Bioavailable 25-hydroxivitamin D (ng/mL) <sup>a</sup>              | 2.1<br>(2.0-2.2)        | 2.0<br>(1.8-2.2)       | 0.125          | 2.2<br>(2.1-2.4)        | 2.2<br>(2.1-2.3)       | 0.687          | 2.3<br>(2.2-2.4)        | 2.5<br>(2.4-2.7)       | 0.021          |
| Free 25-hydroxivitamin D-SNP adjusted (pg/mL) <sup>a</sup>         | 6.4<br>(6.0-6.8)        | 5.9<br>(5.2-6.5)       | 0.258          | 6.6<br>(6.1-7.1)        | 6.6<br>(6.3-6.9)       | 0.861          | 7.0<br>(6.6-7.4)        | 7.5<br>(7.0-8.0)       | 0.267          |

|                                                                    |                  |                  |       |                  |                  |       |                  |                  |       |
|--------------------------------------------------------------------|------------------|------------------|-------|------------------|------------------|-------|------------------|------------------|-------|
| Bioavailable 25-hydroxivitamin D-SNP adjusted (ng/mL) <sup>a</sup> | 2.4<br>(2.2-2.5) | 2.2<br>(2.0-2.4) | 0.283 | 2.5<br>(2.3-2.7) | 2.5<br>(2.4-2.6) | 0.854 | 2.7<br>(2.5-2.9) | 2.9<br>(2.7-3.1) | 0.306 |
|--------------------------------------------------------------------|------------------|------------------|-------|------------------|------------------|-------|------------------|------------------|-------|

<sup>a</sup> Adjusted median (95% CI). Median adjusted by age groups, BMI (normal, overweight, obesity), leisure time physical activity (active >150 min/week), vitamin D intake (quartiles) and smoking (never, smoking, former smoker). Low BMD was defined as a T-score less than -1 at the femoral neck, lumbar spine and hip, according to WHO criteria.

**Table S15.** Association between VDBP categories and low hip BMD in all participants.

| Model                 | All participants n=1,853<br>VDBP tertiles |                                        |                |                                       |                | All women n=1,289<br>VDBP tertiles |                                   |       |                                   |              |
|-----------------------|-------------------------------------------|----------------------------------------|----------------|---------------------------------------|----------------|------------------------------------|-----------------------------------|-------|-----------------------------------|--------------|
|                       | Low<br>(106.8-246.3)<br>OR (95% CI)       | Medium<br>(246.4-299.5)<br>OR (95% CI) | <i>P</i> value | High<br>(299.52-449.7)<br>OR (95% CI) | <i>P</i> value | Low<br>(106.8-250.5)               | Medium<br>(250.9-304.1)           |       | High<br>(304.2-449.7)             |              |
| Crude                 | Ref.                                      | <b>0.71</b><br><b>(0.55,0.92)</b>      |                | <b>0.71</b><br><b>(0.55,0.92)</b>     |                | Ref.                               | <b>0.69</b><br><b>(0.52,0.92)</b> |       | <b>0.53</b><br><b>(0.39,0.72)</b> |              |
| Adjusted <sup>1</sup> | Ref.                                      | 0.84<br>(0.63,1.13)                    | 0.255          | 0.78<br>(0.58,1.01)                   | 0.103          | Ref.                               | 0.79<br>(0.56,1.11)               | 0.181 | <b>0.67</b><br><b>(0.46,0.95)</b> | <b>0.026</b> |
| Adjusted <sup>2</sup> | Ref.                                      | 0.86<br>(0.64,1.16)                    | 0.332          | 0.80<br>(0.59,1.08)                   | 0.137          | Ref.                               | 0.80<br>(0.57,1.13)               | 0.217 | <b>0.67</b><br><b>(0.47,0.96)</b> | <b>0.029</b> |

Model 1 adjusted for age groups, sex, BMI (normal, overweight, obesity), alcohol (g/day), leisure time physical activity (active >30 min/day) and smoking (never, smoking, former smoker). Model 2 adjusted for age groups, sex, BMI (normal, overweight, obesity), alcohol (g/day), leisure time physical activity (active >30 min/day), smoking (never, current, past), vitamin D intake and 25-hydroxivitamin D levels. a Low, medium and high VDBP category levels were defined by tertiles. \*Minimum -maximum value of each category.



**Table S16.** Association between VDBP levels and BMD by menopausal status.

| Model                 | Premenopausal, n=513            |         |                                      |         |                                      |         | Postmenopausal, n=776             |                  |                                      |              |                                      |         |
|-----------------------|---------------------------------|---------|--------------------------------------|---------|--------------------------------------|---------|-----------------------------------|------------------|--------------------------------------|--------------|--------------------------------------|---------|
|                       | Hip BMD<br>(g/cm <sup>2</sup> ) |         | Femoral neck<br>(g/cm <sup>2</sup> ) |         | Spine lumbar<br>(g/cm <sup>2</sup> ) |         | Hip BMD<br>(g/cm <sup>2</sup> )   |                  | Femoral neck<br>(g/cm <sup>2</sup> ) |              | Spine lumbar<br>(g/cm <sup>2</sup> ) |         |
|                       | $\beta$ (95% CI)                | P value | $\beta$ (95% CI)                     | P value | $\beta$ (95% CI)                     | P value | $\beta$ (95% CI)                  | P value          | $\beta$ (95% CI)                     | P value      | $\beta$ (95% CI)                     | P value |
| Crude                 | -0.02<br>(-0.07,0.03)           | 0.479   | 0.009<br>(-0.04,0.06)                | 0.705   | -0.01<br>(-0.06,0.04)                | 0.579   | <b>0.07</b><br><b>(0.03,0.11)</b> | <b>&lt;0.001</b> | <b>0.06</b><br><b>(0.03,0.10)</b>    | <b>0.001</b> | 0.03<br>(-0.02,0.07)                 | 0.213   |
| Adjusted <sup>1</sup> | -0.009<br>(-0.05,0.04)          | 0.699   | 0.006<br>(-0.04,0.05)                | 0.783   | -0.02<br>(-0.07,0.03)                | 0.468   | 0.02<br>(-0.01,0.06)              | 0.165            | 0.02<br>(-0.01,0.05)                 | 0.235        | 0.01<br>(-0.03,0.05)                 | 0.650   |
| Adjusted <sup>2</sup> | -0.01<br>(-0.05,0.04)           | 0.733   | 0.009<br>(-0.03,0.05)                | 0.694   | -0.01<br>(-0.06,0.04)                | 0.615   | 0.02<br>(-0.01,0.06)              | 0.186            | 0.02<br>(-0.01,0.05)                 | 0.284        | 0.008<br>(-0.04,0.05)                | 0.721   |

\* VDBP levels were logarithmically transformed to the base 10. Model 1 adjusted for age groups, BMI (normal, overweight, obesity), alcohol (g/day), leisure time physical activity (active  $\geq 30$  min/day) and smoking (never, smoking, former smoker). Model 2 adjusted for age groups, BMI (normal, overweight, obesity), alcohol (g/day), leisure time physical activity (active  $\geq 30$  min/day), smoking (never, current, past), vitamin D intake and 25-hydroxyvitamin D levels.

**Table S17.** Association between VDBP levels and BMD by VitD status.

| Model                 | Normal Vitamin D, n=1,077                     |         |                                                    |              |                                                    |              | Deficiency Vitamin D, n=775                   |         |                                                    |         |                                                    |         |
|-----------------------|-----------------------------------------------|---------|----------------------------------------------------|--------------|----------------------------------------------------|--------------|-----------------------------------------------|---------|----------------------------------------------------|---------|----------------------------------------------------|---------|
|                       | Hip BMD<br>(g/cm <sup>2</sup> )<br>β (95% CI) | P value | Femoral neck<br>(g/cm <sup>2</sup> )<br>β (95% CI) | P value      | Spine lumbar<br>(g/cm <sup>2</sup> )<br>β (95% CI) | P value      | Hip BMD<br>(g/cm <sup>2</sup> )<br>β (95% CI) | P value | Femoral neck<br>(g/cm <sup>2</sup> )<br>β (95% CI) | P value | Spine lumbar<br>(g/cm <sup>2</sup> )<br>β (95% CI) | P value |
| Crude                 | 0.03<br>(-0.01,0.07)                          | 0.090   | <b>0.05</b><br><b>(0.01,0.09)</b>                  | <b>0.008</b> | <b>0.04</b><br><b>(0.001,0.09)</b>                 | <b>0.047</b> | 0.04<br>(-0.003,0.09)                         | 0.069   | 0.05<br>(-0.002,0.09)                              | 0.059   | 0.01<br>(-0.04,0.06)                               | 0.797   |
| Adjusted <sup>1</sup> | 0.02<br>(-0.01,0.05)                          | 0.281   | 0.03<br>(-0.004,0.06)                              | 0.095        | 0.03<br>(-0.09,0.07)                               | 0.123        | 0.03<br>(-0.002,0.07)                         | 0.068   | 0.03<br>(-0.006,0.07)                              | 0.102   | 0.007<br>(-0.04,0.05)                              | 0.775   |
| Adjusted <sup>2</sup> | 0.02<br>(-0.02,0.05)                          | 0.302   | 0.03<br>(-0.005,0.06)                              | 0.100        | 0.03<br>(-0.01,0.07)                               | 0.128        | 0.04<br>(-0.001,0.07)                         | 0.063   | 0.03<br>(-0.005,0.07)                              | 0.090   | 0.009<br>(-0.04,0.05)                              | 0.699   |

\* VDBP levels were logarithmically transformed to the base 10. Model 1 adjusted for age groups, sex, BMI (normal, overweight, obesity), alcohol (g/day), leisure time physical activity (active ≥30 min/day) and smoking (never, smoking, former smoker). Model 2 adjusted for age groups, sex, BMI (normal, overweight, obesity), alcohol (g/day), leisure time physical activity (active ≥30 min/day), smoking (never, current, past) and vitamin D intake.

**Table S18.** Association between VitD levels and BMD in all population.

| All participants, n=1,853        |                                 |         |                                      |              |                                      |         |
|----------------------------------|---------------------------------|---------|--------------------------------------|--------------|--------------------------------------|---------|
| Total 25 hydroxivitamin D        |                                 |         |                                      |              |                                      |         |
| Model                            | Hip BMD<br>(g/cm <sup>2</sup> ) | P value | Femoral neck<br>(g/cm <sup>2</sup> ) | P value      | Spine lumbar<br>(g/cm <sup>2</sup> ) | P value |
|                                  | β (95% CI)                      |         | β (95% CI)                           |              | β (95% CI)                           |         |
| Crude                            | 0.02<br>(-0.0008,0.05)          | 0.059   | <b>0.03</b><br><b>(0.003,0.05)</b>   | <b>0.030</b> | 0.03<br>(-0.001,0.05)                | 0.055   |
| Adjusted <sup>1</sup>            | 0.0007<br>(-0.0002,0.002)       | 0.109   | <b>0.02</b><br><b>(0.003,0.04)</b>   | <b>0.020</b> | 0.02<br>(-0.006,0.04)                | 0.152   |
| Adjusted <sup>2</sup>            | 0.02<br>(-0.002,0.04)           | 0.073   | <b>0.02</b><br><b>(0.002,0.04)</b>   | <b>0.027</b> | 0.02<br>(-0.007,0.04)                | 0.178   |
| Free 25 hydroxivitamin D         |                                 |         |                                      |              |                                      |         |
| Crude                            | 0.007<br>(-0.009,0.02)          | 0.404   | 0.006<br>(-0.01,0.02)                | 0.455        | 0.008<br>(-0.01,0.03)                | 0.393   |
| Adjusted <sup>1</sup>            | 0.002<br>(-0.01,0.02)           | 0.717   | 0.004<br>(-0.01,0.02)                | 0.532        | 0.004<br>(-0.01,0.02)                | 0.629   |
| Adjusted <sup>2</sup>            | 0.002<br>(-0.01,0.02)           | 0.711   | 0.004<br>(-0.008,0.02)               | 0.519        | 0.004<br>(-0.01,0.02)                | 0.618   |
| Bioavailable 25 hydroxivitamin D |                                 |         |                                      |              |                                      |         |
| Crude                            | 0.01<br>(-0.01,0.03)            | 0.347   | 0.02<br>(-0.004,0.04)                | 0.124        | 0.007<br>(-0.02,0.03)                | 0.535   |
| Adjusted <sup>1</sup>            | 0.005<br>(-0.01,0.02)           | 0.522   | 0.01<br>(-0.004,0.03)                | 0.156        | 0.002<br>(-0.02,0.02)                | 0.771   |
| Adjusted <sup>2</sup>            | 0.005<br>(-0.01,0.02)           | 0.507   | 0.01<br>(-0.004,0.03)                | 0.152        | 0.003<br>(-0.02,0.02)                | 0.801   |

\*Vitamin D levels (total, free and bioavailable 25 hydroxyvitamin D) were logarithmically transformed to the base 10. Model 1 adjusted for age groups, sex, BMI (normal, overweight, obesity), alcohol (g/day), leisure time physical activity (active ≥30 min/day) and smoking (never, smoking, former smoker). Model 2 adjusted for age groups, sex, BMI (normal, overweight, obesity), alcohol (g/day), leisure time physical activity (active ≥30 min/day), smoking (never, current, past) and vitamin D intake.

**Table S19.** Association between VitD levels and BMD by sex.

| All women, n=1289                |                                 |         |                                      |              |                                      |         | All men, n=564                      |              |                                      |              |                                      |         |
|----------------------------------|---------------------------------|---------|--------------------------------------|--------------|--------------------------------------|---------|-------------------------------------|--------------|--------------------------------------|--------------|--------------------------------------|---------|
| Total 25 hydroxivitamin D        |                                 |         |                                      |              |                                      |         |                                     |              |                                      |              |                                      |         |
|                                  | Hip BMD<br>(g/cm <sup>2</sup> ) |         | Femoral neck<br>(g/cm <sup>2</sup> ) |              | Spine lumbar<br>(g/cm <sup>2</sup> ) |         | Hip BMD<br>(g/cm <sup>2</sup> )     |              | Femoral neck<br>(g/cm <sup>2</sup> ) |              | Spine lumbar<br>(g/cm <sup>2</sup> ) |         |
| Model                            | β (95% CI)                      | P value | β (95% CI)                           | P value      | β (95% CI)                           | P value | β (95% CI)                          | P value      | β (95% CI)                           | P value      | β (95% CI)                           | P value |
| Crude                            | 0.01<br>(-0.02,0.04)            | 0.415   | 0.02<br>(-0.005,0.05)                | 0.111        | 0.02<br>(-0.01,0.05)                 | 0.217   | <b>-0.02</b><br><b>(-0.06,0.02)</b> | <b>0.438</b> | <b>-0.02</b><br><b>(-0.07,0.02)</b>  | <b>0.312</b> | -0.01<br>(-0.06,0.03)                | 0.549   |
| Adjusted <sup>1</sup>            | 0.0004<br>(-0.001,0.001)        | 0.421   | <b>0.02</b><br><b>(0.001,0.04)</b>   | <b>0.036</b> | 0.02<br>(-0.002,0.05)                | 0.070   | 0.001<br>(-0.003,0.003)             | 0.120        | 0.02<br>(-0.01,0.06)                 | 0.221        | 0.009<br>(-0.04,0.05)                | 0.695   |
| Adjusted <sup>2</sup>            | 0.013<br>(-0.008,0.03)          | 0.229   | <b>0.02</b><br><b>(0.0003,0.04)</b>  | <b>0.047</b> | 0.02<br>(-0.003,0.05)                | 0.087   | 0.02<br>(-0.01,0.06)                | 0.202        | 0.02<br>(-0.02,0.06)                 | 0.287        | 0.006<br>(-0.04,0.05)                | 0.778   |
| Free 25 hydroxivitamin D         |                                 |         |                                      |              |                                      |         |                                     |              |                                      |              |                                      |         |
| Crude                            | -0.005<br>(-0.02,0.01)          | 0.594   | -0.004<br>(-0.02,0.01)               | 0.644        | 0.003<br>(-0.02,0.02)                | 0.764   | -0.008<br>(-0.04,0.02)              | 0.573        | -0.008<br>(-0.04,0.02)               | 0.583        | -0.02<br>(-0.05,0.02)                | 0.324   |
| Adjusted <sup>1</sup>            | 0.001<br>(-0.01,0.02)           | 0.857   | 0.003<br>(-0.01,0.02)                | 0.642        | 0.01<br>(-0.005,0.03)                | 0.150   | 0.006<br>(-0.02,0.03)               | 0.623        | 0.008<br>(-0.02,0.03)                | 0.569        | 0.01<br>(-0.005,0.03)                | 0.150   |
| Adjusted <sup>2</sup>            | 0.001<br>(-0.01,0.02)           | 0.864   | 0.003<br>(-0.01,0.02)                | 0.640        | 0.01<br>(-0.01,0.03)                 | 0.158   | 0.006<br>(-0.02,0.03)               | 0.620        | 0.007<br>(-0.02,0.03)                | 0.577        | 0.01<br>(-0.005,0.03)                | 0.158   |
| Bioavailable 25 hydroxivitamin D |                                 |         |                                      |              |                                      |         |                                     |              |                                      |              |                                      |         |
| Crude                            | -0.008<br>(-0.03,0.01)          | 0.510   | -0.002<br>(-0.02,0.02)               | 0.852        | -0.0008<br>(-0.03,0.02)              | 0.953   | -0.008<br>(-0.03,0.01)              | 0.510        | -0.002<br>(-0.02,0.02)               | 0.852        | -0.0008<br>(-0.03,0.02)              | 0.953   |
| Adjusted <sup>1</sup>            | 0.006<br>(-0.01,0.02)           | 0.542   | 0.01<br>(-0.007,0.03)                | 0.231        | 0.01<br>(-0.009,0.04)                | 0.229   | 0.006<br>(-0.01,0.02)               | 0.542        | 0.01<br>(-0.007,0.03)                | 0.231        | 0.01<br>(-0.009,0.04)                | 0.229   |
| Adjusted <sup>2</sup>            | 0.006<br>(-0.01,0.02)           | 0.536   | 0.01<br>(-0.007,0.03)                | 0.246        | 0.01<br>(-0.009,0.04)                | 0.250   | 0.005<br>(-0.01,0.02)               | 0.536        | 0.01<br>(-0.007,0.03)                | 0.246        | 0.01<br>(-0.01,0.04)                 | 0.250   |

\* Vitamin D levels (total, free and bioavailable 25 hydroxyvitamin D) were logarithmically transformed to the base 10. Model 1 adjusted for age groups, BMI (normal, overweight, obesity), alcohol (g/day), leisure time physical activity (active ≥30 min/day) and smoking (never, smoking, former smoker). Model 2 adjusted for age groups, BMI (normal, overweight, obesity), alcohol (g/day), leisure time physical activity (active ≥30 min/day), smoking (never, current, past) and vitamin D intake.

**Table S20.** Association between VitD levels and BMD by menopausal status.

|                       | Premenopausal, n=513             |         |                                      |         |                                      |         | Postmenopausal, n=776             |              |                                      |                  |                                      |         |
|-----------------------|----------------------------------|---------|--------------------------------------|---------|--------------------------------------|---------|-----------------------------------|--------------|--------------------------------------|------------------|--------------------------------------|---------|
|                       | Total 25 hydroxivitamin D        |         |                                      |         |                                      |         |                                   |              |                                      |                  |                                      |         |
|                       | Hip BMD<br>(g/cm <sup>2</sup> )  |         | Femoral neck<br>(g/cm <sup>2</sup> ) |         | Spine lumbar<br>(g/cm <sup>2</sup> ) |         | Hip BMD<br>(g/cm <sup>2</sup> )   |              | Femoral neck<br>(g/cm <sup>2</sup> ) |                  | Spine lumbar<br>(g/cm <sup>2</sup> ) |         |
| Model                 | β (95% CI)                       | P value | β (95% CI)                           | P value | β (95% CI)                           | P value | β (95% CI)                        | P value      | β (95% CI)                           | P value          | β (95% CI)                           | P value |
| Crude                 | -0.01<br>(-0.05,0.03)            | 0.544   | 0.001<br>(-0.03,0.04)                | 0.950   | 0.02<br>(-0.02,0.06)                 | 0.245   | <b>0.05</b><br><b>(0.01,0.08)</b> | <b>0.008</b> | <b>0.06</b><br><b>(0.03,0.09)</b>    | <b>&lt;0.001</b> | 0.04<br>(-0.003,0.08)                | 0.037   |
| Adjusted <sup>1</sup> | 0.001<br>(-0.001,0.002)          | 0.497   | 0.02<br>(-0.01,0.06)                 | 0.169   | 0.03<br>(-0.01,0.07)                 | 0.116   | 0.0005<br>(-0.0009,0.002)         | 0.506        | 0.03<br>(-0.003,0.05)                | 0.075            | 0.02<br>(-0.01,0.06)                 | 0.234   |
| Adjusted <sup>2</sup> | 0.01<br>(-0.02,0.05)             | 0.380   | 0.02<br>(-0.01,0.05)                 | 0.182   | 0.03<br>(-0.009,0.06)                | 0.134   | 0.02<br>(-0.01,0.04)              | 0.308        | 0.02<br>(-0.004,0.05)                | 0.100            | 0.02<br>(-0.02,0.06)                 | 0.262   |
|                       | Free 25 hydroxivitamin D         |         |                                      |         |                                      |         |                                   |              |                                      |                  |                                      |         |
| Crude                 | 0.003<br>(-0.02,0.03)            | 0.836   | 0.004<br>(-0.02,0.03)                | 0.748   | 0.01<br>(-0.01,0.04)                 | 0.387   | 0.003<br>(-0.02,0.03)             | 0.800        | 0.007<br>(-0.02,0.03)                | 0.558            | 0.02<br>(-0.01,0.04)                 | 0.217   |
| Adjusted <sup>1</sup> | 0.002<br>(-0.02,0.02)            | 0.843   | 0.005<br>(-0.02,0.03)                | 0.666   | 0.01<br>(-0.01,0.04)                 | 0.256   | 0.001<br>(-0.02,0.02)             | 0.895        | 0.003<br>(-0.02,0.02)                | 0.746            | 0.01<br>(-0.01,0.04)                 | 0.256   |
| Adjusted <sup>2</sup> | 0.002<br>(-0.02,0.02)            | 0.826   | 0.005<br>(-0.02,0.03)                | 0.643   | 0.01<br>(-0.01,0.04)                 | 0.275   | 0.001<br>(-0.02,0.02)             | 0.923        | 0.003<br>(-0.02,0.02)                | 0.763            | 0.01<br>(-0.01,0.04)                 | 0.275   |
|                       | Bioavailable 25 hydroxivitamin D |         |                                      |         |                                      |         |                                   |              |                                      |                  |                                      |         |
| Crude                 | -0.001<br>(-0.03,0.03)           | 0.920   | 0.01<br>(-0.02,0.04)                 | 0.441   | 0.008<br>(-0.03,0.04)                | 0.649   | -0.001<br>(-0.03,0.03)            | 0.920        | 0.01<br>(-0.02,0.04)                 | 0.441            | 0.008<br>(-0.03,0.04)                | 0.649   |
| Adjusted <sup>1</sup> | 0.001<br>(-0.02,0.03)            | 0.955   | 0.009<br>(-0.01,0.03)                | 0.460   | 0.01<br>(-0.02,0.04)                 | 0.533   | 0.001<br>(-0.02,0.03)             | 0.955        | 0.009<br>(-0.01,0.03)                | 0.460            | 0.01<br>(-0.02,0.04)                 | 0.533   |
| Adjusted <sup>2</sup> | 0.001<br>(-0.02,0.03)            | 0.950   | 0.008<br>(-0.02,0.03)                | 0.499   | 0.01<br>(-0.02,0.04)                 | 0.562   | 0.001<br>(-0.02,0.03)             | 0.950        | 0.008<br>(-0.02,0.03)                | 0.499            | 0.01<br>(-0.02,0.04)                 | 0.562   |

Vitamin D levels (total, free and bioavailable 25 hydroxyvitamin D) were logarithmically transformed to the base 10. Model 1 adjusted for age groups, BMI (normal, overweight, obesity), alcohol (g/day), leisure time physical activity (active ≥30 min/day) and smoking (never, smoking, former smoker). Model 2 adjusted for age groups, BMI (normal, overweight, obesity), alcohol (g/day), leisure time physical activity (active ≥30 min/day), smoking (never, current, past) and vitamin D intake.
